1  
2  
3  
4  
5  
6  
7  
8  
9  
10  
11  
12  
13  
14  
15  
16  
17  
18  
19  
20

# **SARS-CoV-2 Spike Affinity and Dynamics Exclude the Strict Requirement of an Intermediate Host**

Matteo Castelli<sup>1†</sup>, Luigi Scietti<sup>3†</sup>, Nicola Clementi<sup>1,2</sup>, Mattia Cavallaro<sup>1</sup>, Silvia Faravelli<sup>3</sup>,  
Alberta Pinnola<sup>3</sup>, Elena Criscuolo<sup>1</sup>, Roberta Antonia Diotti<sup>1</sup>, Massimo Clementi<sup>1,2</sup>, Federico  
Forneris<sup>3‡\*</sup> and Nicasio Mancini<sup>1,2‡\*</sup>

<sup>1</sup>Laboratory of Medical Microbiology and Virology, Vita-Salute San Raffaele University; via  
Olgettina 58, 20132 Milan, Italy.

<sup>2</sup>Laboratory of Medical Microbiology and Virology, IRCCS San Raffaele Scientific Institute;  
via Olgettina 60, 20132 Milan, Italy.

<sup>3</sup>The Armenise-Harvard Laboratory of Structural Biology, Department of Biology and  
Biotechnology, University of Pavia; via Ferrata 9/A, 27100 Pavia, Italy.

†These authors contributed equally to this work.

‡These authors jointly supervised this work.

\*Corresponding authors. Emails: federico.forneris@unipv.it and mancini.nicasio@hsr.it

1  
2  
3

21 **Abstract**

22 SARS-CoV-2 proximal origin is still unclear, limiting the possibility of foreseeing other  
23 spillover events with pandemic potential. Here we propose an evolutionary model based on  
24 the thorough dissection of SARS-CoV-2 and RaTG13 – the closest bat relative – spike  
25 dynamics, kinetics and binding to ACE2. Our results indicate that both spikes share nearly  
26 identical, high affinities for *Rhinolophus affinis* bat and human ACE2, pointing out to  
27 negligible species barriers directly related to receptor binding. Also, SARS-CoV-2 spike  
28 shows a higher degree of dynamics and kinetics optimization that favors ACE2 engagement.  
29 Therefore, we devise an affinity-independent evolutionary process that likely took place in *R.*  
30 *affinis* bats and limits the eventual involvement of other animal species in initiating the  
31 pandemic to the role of vector.

32

### 33 **Introduction**

34 The *Coronaviridae* family comprises seven species of human interest; four are endemic and  
35 highly adapted to humans (HCoV-229E, HCoV-NL63, HCoV-OC43 and HCoV-HKU1), two  
36 epidemic (MERS-CoV and SARS-CoV-1) and one pandemic (SARS-CoV-2). Except for  
37 HCoV-OC43 and HCoV-HKU1, their ancestral origin can be traced back to coronaviruses  
38 (CoV) infecting bats, the main natural host reservoir of  $\alpha$ - and  $\beta$ -coronavirus genera (1–3).  
39 Epidemic CoVs are characterized by low inter-human transmission and high fatality rate,  
40 indicative of a zoonotic infection and a sub-optimal adaptation to humans, and gained the  
41 ability to infect humans following adaptation in a putative intermediate host, although with  
42 different evolutionary trajectories (4). While MERS-CoV ancestors stably adapted to  
43 dromedary camels decades ago diverging from bat MERS-related viruses, SARS-CoV-1  
44 direct ancestor seems to have transiently jumped from horseshoe bats (*Rhinolophus* spp.) to  
45 palm civets and/or raccoon dogs, accumulating a few mutations that incidentally increased its  
46 ability to infect humans.

47 SARS-CoV-2 was first identified in the city of Wuhan in December 2019 and rapidly  
48 spread worldwide due to a high inter-human transmission rate and a relevant percentage of  
49 asymptomatic and paucisymptomatic infections (5, 6). Phylogenetic analysis identified  
50 SARS-CoV-2 as a member of a novel clade in the *Sarbecovirus* lineage that also comprises  
51 viruses identified in Southeast Asian pangolins (*Manis javanica* and *Manis pentadactyla*) and  
52 horseshoe bats (7–9). Among them, RaTG13, collected in 2013 from a *R. affinis* specimen in  
53 China's Yunnan province, shows the highest homology to SARS-CoV-2 both genome-wide  
54 and at the spike gene level, thus supporting its bat origin (5, 10). In analogy with SARS-CoV-  
55 1 and several bat SARS-related (SARSr) viruses, both RaTG13 and SARS-CoV-2 engage the  
56 host angiotensin-converting enzyme 2 (ACE2) to mediate cell entry despite the high sequence  
57 divergence at the receptor binding domain (RBD) (11, 12).

58 In principle, a virus spillover probability is directly proportional to the phylogenetic  
59 distance between donor and recipient species, and adaptation in an intermediate host may  
60 serve to lower the species barrier. Compared to other viruses, CoVs can jump among host  
61 species with relative ease and the major tropism determinant is represented by the spike  
62 ability to mediate entry, in turn mainly dependent on the host receptor orthologues  
63 conservation. Under this perspective, ACE2 differences between humans and *R. affinis* argue  
64 against a direct spillover event. Indeed, albeit still competent, RaTG13 spike binds to human  
65 ACE2 (hACE2) and mediates pseudotyped virus entry at a lower extent than SARS-CoV-2  
66 (12, 13). While this favors the hypothesis of an intermediate host, no evidence of it have  
67 emerged so far, leaving several unanswered questions on the evolutionary path followed by  
68 SARS-CoV-2 and posing major concerns on the possible emergence of related viruses with  
69 pandemic potential (14).

70 To trace SARS-CoV-2 evolutionary trajectory, we used a combination of surface plasmon  
71 resonance (SPR), X-ray crystallography and molecular dynamics (MD) simulation-based  
72 techniques to characterize the functional features of RaTG13 and SARS-CoV-2 spikes.  
73 Despite sequence divergence, we found that both RBDs engage hACE2 with nearly identical  
74 binding mode and affinity. Furthermore, we measured comparable affinities in the nanomolar  
75 range also for *R. affinis* ACE2 (*affiACE2*). At the spike level, SARS-CoV-2 is significantly  
76 more optimized to expose the RBD in the conformation competent to ACE2 binding and  
77 mutations in all domains contribute to it. Taken together, our results point out to an  
78 evolutionary process that regarded exclusively the spike dynamics and kinetics through the  
79 fine-tuning of the pre-fusion states metastability. Also, RaTG13 and SARS-CoV-2 RBD  
80 promiscuity rules out the requirement of an intermediate host to lower the species barrier.

81

82

10

11

12

## 83 Results

### 84 ***The binding of RaTG13 and SARS-CoV-2 RBD to *affi*ACE2 and hACE2 is nearly identical***

85 Several bat SARSr viruses have the ability to recognize hACE2, surprisingly often at  
86 higher affinity than bat ACE2, without prior adaptation (15). The marked sequence  
87 differences between RaTG13/SARS-CoV-2 RBDs (89.2% amino acid identity) and human/*R.*  
88 *affinis* ACE2 (80.7% identity), and in particular those found at the RBD-ACE2 interface  
89 (Figure 1a), suggest high species barriers to efficient binding and therefore the need of  
90 adaptation in an intermediate host. To verify this hypothesis, we first measured the affinity of  
91 RaTG13 and SARS-CoV-2 RBDs for hACE2 by SPR. Surprisingly, we found that both  
92 RBDs bind to hACE2 with  $K_d$  in the nanomolar range (21 and 41 nM, respectively) (Figure  
93 2a). We confirmed SPR measurements through *in silico* free energy calculations (Table S1)  
94 and, prompted by these observations, we attempted crystallization of the RaTG13  
95 RBD/hACE2 complex, obtaining crystals suitable for diffraction experiments in two distinct  
96 crystal forms (Table S2). After structure determination using molecular replacement, crystal  
97 form 1 yielded a 4.5 Å resolution structure of the RaTG13 RBD/hACE2 complex (Figure 2b)  
98 showing identical crystal packing assembly to that of the previously determined SARS-CoV-  
99 2 RBD/hACE2 complex, whereas crystal form 2 could be solved at 6.5 Å resolution,  
100 revealing a different crystal packing assembly (Figure S1) (12). Both RaTG13 RBD/hACE2  
101 structures are superimposable to SARS-CoV-2 RBD/hACE2, with minor adjustments  
102 associated to the amino acid differences. Therefore, sequence differences between RaTG13  
103 and SARS-CoV-2 RBD do not affect the binding mode nor the affinity for hACE2.

104 To further characterize the evolutionary trajectory of SARS-CoV-2, we next measured  
105 RBDs affinity for *affi*ACE2. Several *affi*ACE2 sequences were recently deposited and show  
106 moderate variability, with eight polymorphic positions (15). We mined the original raw  
107 sequencing dataset RaTG13 was identified from and uniquely determined that the specific *R.*

108 *affinis* specimen carried a minority allele, characterized by the H34, D38 – both lying at the  
109 RBD/ACE2 interface – and A185 polymorphisms (Figure 1b). SPR measurements show  
110 RaTG13 and SARS-CoV-2 RBD affinities for *affi*ACE2 almost identical to hACE2 (12 and  
111 18 nM, respectively), in agreement with *in silico* calculations (Figure 2A and Table S1).  
112 Thus, in terms of RBD affinity, the species barrier between *R. affinis* bats and humans is  
113 negligible for both RaTG13 and SARS-CoV-2, strongly supporting the possibility of a direct  
114 species jump from bats to humans of SARS-CoV-2 and related viruses. As a consequence,  
115 SARS-CoV-2 might have directly evolved in *R. affinis* bats.

116

### 117 ***RaTG13 Spike Dynamics is Suboptimal for ACE2 Engagement***

118 Our results indicate that the affinity of RaTG13 and SARS-CoV-2 RBD for hACE2 is  
119 equivalent. However, when the entire spike is considered, SARS-CoV-2 is a significantly  
120 better hACE2 binder and mediates pseudotyped virus entry more efficiently (12, 13).  
121 RaTG13 spike cryoEM structures show exclusively the closed state, while SARS-CoV-2  
122 uncleaved, S0 form is found also in the 1-up state (one RBD exposed and two closed),  
123 suggesting that different functional properties might be related to the spike propensity of  
124 exposing the RBD for ACE2 engagement. To verify this hypothesis, we performed full-atom,  
125 unbiased MD simulations of the entire ectodomains in the closed and 1-up states for both  
126 SARS-CoV-2 and RaTG13 and monitored their RBDs geometry – opening ( $\Psi$ ) and rotation  
127 ( $\Phi$ ) angles, as defined in Figure 3a – and interactions. The closed protomers are stable in all  
128 simulated systems, but RaTG13 spike acquires a more compact structure, as evidenced by the  
129 closed RBDs lower rotation angle and RBD-RBD stronger contacts and correlated  
130 movements in both state (Figure 3b-c and S4). These conformational differences are far more  
131 marked in the open RBD of the 1-up states. Indeed, while SARS-CoV-2 S0 shows an RBD  
132 opening comparable to the starting cryoEM structure, RaTG13 rapidly stabilizes in an

16

17

18

133 intermediate conformation between the open and closed states (Figure 3b and S3), losing  
134 most of the interactions and correlated motions between the open and clockwise closed RBDs  
135 (Figure 3c and S4). To test whether RaTG13 RBD suboptimal exposure is sufficient to allow  
136 the binding to ACE2, we reconstructed the spike/hACE2 complex and found it to be stable  
137 over a 200 ns MD simulation, thus confirming RaTG13 competence for receptor engagement  
138 in this conformation (Figure S5). Nonetheless, this intermediate aperture provide an  
139 explanation of the stark difference in affinity for hACE2 between RaTG13 spike and RBD  
140 and its lower functionality compared to SARS-CoV-2.

141 To further explore the dynamic properties of RaTG13 and SARS-CoV-2 spike, we next  
142 performed targeted MD simulations (TMD) with a linearly increasing bias over 200 ns to  
143 drive the closed-to-1-up and 1-up-to-closed transitions using the conformations previously  
144 identified in our unbiased MD simulations. The 1-up-to-closed transition is similar between  
145 RaTG13 and SARS-CoV-2, as both follow a biphasic kinetics with an initial lag phase –  
146 related to the displacement of the counterclockwise protomer N-terminal domain (NTD) and  
147 RBD required to accommodate the closure movement – followed by a rapid RBD closure  
148 (Figure 4). Conversely, the closed-to-1up transitions follow markedly different paths: as a  
149 consequence of the closed RBDs tight interactions, RaTG13 opening is slow and  
150 geometrically almost linear, while SARS-CoV-2 S0 is faster and follows a biphasic  
151 transition. Its kinetics presents a preparatory initial phase where the RBD motion changes  
152 slowly and a subsequent abrupt switch to the open state, indicating that the spike reached a  
153 conformation where the RBD is free to move. Altogether, the mutations from RaTG13 to  
154 SARS-CoV-2 affect the entire spike pre-fusion states metastability and, by optimizing the  
155 RBDs angle of exposure and transitions kinetics, they increase infectivity regardless of the  
156 direct affinity for ACE2.

157

19

20

21

## 158 ***RaTG13 Spike Mutations to SARS-CoV-2 Cooperatively Regulate RBD Aperture***

159 Besides the 21 mutations in the RBD, RaTG13 and SARS-CoV-2 spikes differ on four  
160 positions in the NTD, one in each subdomain 1 and 2 (SD1 and SD2, respectively), two in S2  
161 (of which only S1125N is comprised in the cryoEM structures and our systems) and the furin  
162 cleavage site, a four-residue insertion (<sup>681</sup>PRRA<sup>684</sup>) at the S1/S2 junction (Figure 5a). Hence,  
163 the dramatic differences between RaTG13 and SARS-CoV-2 spike dynamics may be due to  
164 the local effect of RBD mutations, the allosteric effects of distal insertion/mutations in other  
165 domains or the furin cleavage during spike biogenesis. A direct involvement of the RBD is  
166 supported by the negligible differences in affinity and by the fact that several mutated  
167 residues lie either at the closed RBD-RBD interface (position 372, 403, 439, 440, 498, 501  
168 and 505) that stabilizes RaTG13 or between the open RBD and that in the clockwise closed  
169 protomer (position 372, 478 and 486) that stabilizes SARS-CoV-2 open RBD (Figure S6). To  
170 test this, we introduced SARS-CoV-2 RBD in the RaTG13 spike backbone alone  
171 (RaTG13<sub>RBD</sub>), in combination with the furin cleavage site (RaTG13<sub>RBD+PRRA</sub>) or with the  
172 mutations in NTD, SD1, SD2 and S2 (SARS-CoV-2<sub>ΔPRRA</sub>). Worth mentioning, SARS-CoV-  
173 2<sub>ΔPRRA</sub> subpopulations naturally occur at very low frequency *in vitro* and in patients,  
174 demonstrating its residual functionality but also a markedly lower fitness (17–19). The 1-up  
175 state of RaTG13<sub>RBD</sub> and SARS-CoV-2<sub>ΔPRRA</sub> shows large RBD opening ( $\Psi \sim 130^\circ$  and  $\sim 120^\circ$ ,  
176 respectively) and rotation angles ( $\Phi \sim 50^\circ$  and  $\sim 60^\circ$ , respectively) (Figure 5b). Similar  $\Psi$   
177 values are found in SARS-CoV-2 cryoEM structures, but  $\Phi$  values are always below  $\sim 35^\circ$ ,  
178 suggesting a functional limit to RBD rotation (20, 21). To confirm this hypothesis, we  
179 applied a steered molecular dynamics (SMD) protocol to SARS-CoV-2 3-up spike fully  
180 engaged with ACE2 to drive all RBDs to  $\Phi = 60^\circ$ . Reaching the target rotation angle indeed  
181 also causes large  $\Psi$  increases (up to  $165^\circ$ ) and dramatic S1 rearrangements (Figure S7), thus  
182 relating SARS-CoV-2<sub>ΔPRRA</sub> low fitness to prevented furin cleavage and disrupted spike

22

23

24



183 conformation. Conversely, RaTG13<sub>RBD+PRRA</sub> has an opening angle comparable to SARS-CoV-  
184 2 S0 and a remarkably low rotation ( $\Phi \sim -10^\circ$ ). Since we recently characterized a SARS-CoV-  
185 2 clinical isolate with analogous  $\Phi$  angle and driving the 3-up state to this  $\Phi$  value in SMD  
186 does not alter the spike global conformation (Figure S7), we can speculate that  
187 RaTG13<sub>RBD+PRRA</sub> geometry is functional (22). Therefore, we next analyzed its closed-to-1up  
188 transition in TMD and identified a biphasic kinetics similar to SARS-CoV-2 S0, although  
189 smoother and slower (Figure S8). The hybrid systems involving SARS-CoV-2 RBD confirm  
190 that the sequence of this domain dominates the spike dynamics and kinetics. However, the  
191 inclusion of mutations in other domains also highlights relevant allosteric effects. In support  
192 to this, structural inspection of RaTG13<sub>RBD</sub> and SARS-CoV-2 <sub>$\Delta$ PRRA</sub> trajectories shows that the  
193 RBD large aperture is stabilized by the N519H RBD mutation, as the histidine stably inserts  
194 into a hydrophobic pocket created by residues V130, F168, L229, I231 and I233 (Figure S9)  
195 in the counterclockwise protomer NTD, that is conserved in all tested systems.

196 To expand each spike domain involvement, we next inserted the cleavage site (RaTG13<sub>PRRA</sub>),  
197 mutations in NTD, SD1, SD2 and S2 (RaTG13<sub>others</sub>) or their combination (RaTG13<sub>others+PRRA</sub>)  
198 into the RaTG13 spike backbone. RaTG13<sub>PRRA</sub> and RaTG13<sub>others</sub> show larger opening angles  
199 ( $\Psi \sim 120-125^\circ$ ) and a rotation comparable to SARS-CoV-2, while in RaTG13<sub>others+PRRA</sub> the  
200 combination of mutations in all domains but the RBD results in a geometry the closest to the  
201 wild-types. Altogether, all domains participate in fine-tuning the spike dynamics through  
202 long-range allosteric effects. Our results, together with previous cryoEM structures and  
203 functional data, also suggest the existence of functional limits to the RBD geometry. In this  
204 scenario, SARS-CoV-2 RBD high propensity to open and rotate may be detrimental in  
205 specific spike contexts, outlining a constrained co-evolution of the spike where allosteric  
206 effects from the <sup>681</sup>PRRA<sup>684</sup> insertion and other domains limit it.

207

25

26

27

## 208 ***Furin Cleavage Effects Depend on Residues Located Across the Spike Ectodomain***

209 The furin cleavage site at the S1/S2 junction is found in several unrelated bat  $\beta$ -  
210 coronaviruses and a few SARS-CoV-2-related viruses bearing partial furin cleavage site have  
211 been recently identified in horseshoe bats, supporting the possibility it arose along the  
212 evolution in *R. affinis* (7, 8, 23). While a selective advantage of incorporating it comes from a  
213 spike already primed for fusion during biogenesis, cryoEM structures of SARS-CoV-2 S1/S2,  
214 cleaved spike demonstrated also a higher propensity to expose the RBDs than the S0 form.  
215 To better explore the molecular details associated to furin cleavage and hypothesize when  
216 and how the cleavage site was incorporated, we ran unbiased MD simulations of the cleaved,  
217 S1/S2 spike form of all wild-type and hybrid systems bearing the <sup>681</sup>PRRA<sup>684</sup> sequence  
218 (Figure 5).

219 Compared to the uncleaved form, SARS-CoV-2 S1/S2 1-up state open RBD is in a more  
220 upright position achieved through a balanced increase in opening and rotation angles. This  
221 conformation is highly similar to that of the ACE2-bound, cleaved spike structure described  
222 by Benton *et al.*, demonstrating that ACE2 acts by stabilizing rather than inducing it (20).  
223 The transitions simulated in TMD show slower 1-up-to-closed and faster closed-to-1up  
224 kinetics compared to the uncleaved form. The latter transition is improved both overall and  
225 considering exclusively the switch phase, as confirmed by short TMDs performed starting  
226 from the end of the lag phase at different fixed biases (Figure 4 and S10). Besides allowing  
227 the virus to fuse directly at the plasma membrane in the presence of the TMPRSS2 host  
228 protease, this indicates that furin cleavage improves infectivity by increasing RBD aperture  
229 and altering the closed/open balance, thus explaining the shift towards the 1-up state  
230 evidenced in cryoEM (13).

231 We next investigated the dynamic properties of furin-cleavable RaTG13/SARS-CoV-2  
232 hybrid spikes to dissect the impact of furin cleavage in association with other mutations.

233 Cleaved RaTG13<sub>RBD+PRRA</sub> shows a slight reduction in the opening angle and a marked increase  
234 in the rotation compared to the S0 form, thus not reaching SARS-CoV-2 aperture in either  
235 forms. Also, cleaved RaTG13<sub>RBD+PRRA</sub> closed-to-1-up transition follows the same geometric  
236 path of the uncleaved form albeit with a faster kinetics (Figure S8), confirming furin cleavage  
237 importance in favoring SARS-CoV-2 RBD exposure. Finally, cleaved, 1-up RaTG13<sub>PRRA</sub> and  
238 RaTG13<sub>others+PRRA</sub> display only minor differences in RBD aperture compared to their  
239 respective S0 forms. Altogether, cleaved hybrid systems point out to the role of NTD, SD1,  
240 SD2 and S2 mutations in propagating furin cleavage effects to the RBD and suggest that, in  
241 the absence of the prone-to-open SARS-CoV-2 RBD, the impact of furin cleavage on the  
242 spike dynamics is limited.

243 Given the furin cleavage site insertion/abrogation relevance in all tested S0 molecular  
244 contexts, we finally verified whether its influence is length- or sequence-dependent by  
245 mutating <sup>681</sup>PRRA<sup>684</sup> into <sup>681</sup>GSAS<sup>684</sup> to construct the RaTG13<sub>GSAS</sub> and SARS-CoV-2<sub>GSAS</sub>  
246 systems. The former 1-up state shows a RBD opening and rotation highly similar to  
247 RaTG13<sub>PRRA</sub>, suggesting that the conformational changes may be induced by the increased  
248 SD2 length (Figure 5c). However, SARS-CoV-2<sub>GSAS</sub> 1-up RBD aperture is the closest to  
249 SARS-CoV-2<sub>RBD</sub>, indicating that both SD2 length and a polybasic sequence are needed to  
250 compensate for SARS-CoV-2 RBD tendency to open. Altogether, these results strongly  
251 support a progressive onset and a continuous co-evolution of the SD2 domain with the RBD,  
252 further optimized by adaptation in all spike domains.

253

254

## 255 Discussion

256 Bats species belonging to different families harbor the highest diversity of  $\alpha$ - and  $\beta$ -  
257 coronaviruses worldwide and have been identified as the ancestral source of five out of seven  
258 CoV species of medical interest (1). Also, CoVs diversity proportionally increases with the  
259 number of different bat species co-existing in a single habitat and intra-host receptor  
260 variability (24). The tight co-evolution of CoVs and bats is particularly evident when SARSr  
261 viruses and their long-term natural host – the horseshoe bat *R. sinicus* – are considered.  
262 Indeed, high ACE2 diversity is found exclusively at the RBD-binding interface and different  
263 ACE2 alleles sustain to a variable extent bat SARSr RBD binding and entry in a virus  
264 species-specific manner, suggesting an intra-host spike evolutionary process driven by the  
265 transfer between host subpopulations and subsequent adaptation (15). The same study also  
266 reported that the RBD of two of the closest SARS-CoV-1 relatives, RsWIV1 and RsSHC014,  
267 bound with a 10-fold higher affinity human than *R. sinicus* ACE2 ( $10^{-7}$  and  $10^{-6}$  M,  
268 respectively), while SARS-CoV-1 RBD displayed the same trend but with a 1000-fold  
269 difference in favor of hACE2 ( $10^{-8}$  and  $10^{-5}$  M). This demonstrates that, considering  
270 exclusively RBD affinity for the receptor, several bat SARSr viruses could in principle infect  
271 humans without prior adaptation, but sustained human-to-human transmission requires a  
272 tighter binding to hACE2. In addition, RBD mutations accumulated along the evolution in  
273 palm civets and humans have increased the affinity for their ACE2 at the expense of the  
274 efficient binding to that of the reservoir species. Worth mentioning, a similar process has  
275 been postulated for MERS-CoV as well, despite different receptor usage, host species tropism  
276 and permanence in intermediate hosts (25). Altogether, RBD/ACE2 affinity of human and  
277 closely related, animal viruses for their respective host receptor efficiently recapitulate their  
278 evolutionary trajectory, suggesting this affinity-based strategy can be used to characterize  
279 other spillover events and trace back SARS-CoV-2 origin.

280 Our SPR measurements and *in silico* calculations of the RBD/ACE2 complexes point out  
281 to unique binding features representative of an evolutionary trajectory radically different  
282 from that of SARS-CoV-1. We note that RaTG13 RBD/hACE2 affinity and structure were  
283 recently determined and diverge from our results (49). However, some of the proteins used in  
284 that study were produced in insect cells, leading to a different hACE2 glycosylation pattern  
285 (N90 and N432 glycosylations are uniquely present in our structure, while N322 is absent)  
286 that may be at the basis of the discrepancies between SPR measurements. Our results show  
287 that SARS-CoV-2 and RaTG13 RBDs both have affinities for *affi*ACE2 and hACE2 in the  
288 low nanomolar range ( $10^{-8}$  M) despite sequence divergence. Compared to SARS-CoV-1,  
289 SARS-CoV-2 displays similar binding to hACE2 but a 1000-fold higher affinity to its closest  
290 relative natural host receptor, while RaTG13, compared to SARSr viruses, has a 100- and 10-  
291 fold higher affinity for its natural host receptor and hACE2, respectively. Therefore,  
292 considering its RBD affinity for hACE2, RaTG13 has a higher potential of directly crossing  
293 the species barrier to humans than previously determined for bat SARSr viruses (26). Also,  
294 the fact that SARS-CoV-2 RBD is endowed with identical binding features and poorly binds  
295 to other *Rhinolophus* spp. ACE2 as recently determined strongly suggests the virus directly  
296 evolved in *R. affinis* (27). Altogether, the affinity pattern we identified does not fit into an  
297 evolutionary model implying an intermediate host and supports SARS-CoV-2 direct spillover  
298 from *R. affinis* bats allowed by its unprecedented affinity for the natural host receptor and the  
299 promiscuous binding to hACE2 – and several other orthologues – without adaptation (28–  
300 30).

301 The accumulation of a large number of mutations at the RBD that does not result in  
302 affinity changes during permanence in the same host is counter-intuitive from an evolutionary  
303 perspective, as does not confer any obvious selective advantage. Nonetheless, SARSr  
304 RsSHC014 and RsWIV1 show very similar traits: they are highly homologous genome- and

305 spike-wide but 35 mutations are found at the RBD, they have a stable and negligible RBD net  
306 charge despite the selection of many charge-changing mutations and they have the same  
307 affinity profile for hACE2 and *R. sinicus* major alleles (15). However, their evolution was  
308 prompted by *R. sinicus* ACE2 high variability, while *affi*ACE2 is moderately variable, with  
309 only two polymorphic positions at the RBD/ACE2 interface. Thus, whether SARS-CoV-2  
310 ancestors circulated in a mixed *R. affinis* population or stably transferred from one  
311 subpopulation to the other, RBD direct affinity improvement is not the evolutionary driving  
312 force of SARS-CoV-2 spike. Therefore, we extended our analysis at the whole spike level,  
313 performing unbiased and enhanced sampling MD simulations of the spike ectodomains to  
314 evaluate their dynamics and kinetics. Our results expand the previous knowledge derived  
315 from cryoEM structures of SARS-CoV-2 spike S0 and furin-cleaved forms being  
316 increasingly more prone to adopt the 1-up state than RaTG13 (13). We demonstrated that  
317 RaTG13 1-up state engages the host receptor with a sub-optimal RBD angle that has direct  
318 effects on spike affinity and indirect on avidity through the curtailed transition to the 2-up  
319 and 3-up states, thus relating the marked discrepancies between RaTG13 and SARS-CoV-2  
320 spike functionality to global structural features. We found that optimal SARS-CoV-2 RBD  
321 aperture in the 1-up state and transition kinetics are both determined by RBD-RBD inter-  
322 protomer interactions and allosteric effects from distal domains. Indeed, SARS-CoV-2 RBD  
323 has a higher propensity to open *per se* through looser RBD-RBD interactions that involve  
324 protomers in the closed state and tighter interactions between the open and the closed,  
325 clockwise RBDs in the 1-up state. RaTG13 mutation to SARS-CoV-2 of each domain in  
326 single always leads to a 1-up RBD larger opening angle, and a fundamental regulatory role is  
327 played by the furin cleavage site insertion, that always limits RBD opening and rotation when  
328 combined to mutations in other domains. Also, the <sup>681</sup>PRRA<sup>684</sup> insertion effects on the spike  
329 global dynamics are both length- and sequence-dependent and rely on the correct signal

330 propagation to the RBD that is determined by the spike background, as demonstrated by the  
331 different conformational rearrangements induced in cleaved hybrid systems compared to  
332 SARS-CoV-2. Altogether, our results point out to a progressive co-evolution of SARS-CoV-  
333 2 spike that improved receptor engagement exclusively in a RBD direct affinity-independent  
334 fashion through the accumulation of single-point mutations. Given the contribution of each  
335 domain to the spike dynamics, the strongest selective pressures were on the RBD: its  
336 evolution was driven by conformational optimization and constrained by maintenance of  
337 direct RBD/ACE2 affinity and proper configuration of titratable amino acids – a trait  
338 common to other SARSr viruses likely linked to the spike exposure to mildly acidic pH  
339 during cell egress and stomach transit to cause enteric infection in bats (31). As such, a  
340 discrete recombination event, previously hypothesized to be at the basis of SARS-CoV-2  
341 RBD acquisition in a RaTG13-like spike molecular context, seems unlikely, as it should have  
342 taken place after <sup>681</sup>PRRA<sup>684</sup> insertion to counteract SARS-CoV-2 RBD intrinsic tendency to  
343 open and rotate (32, 33).

344 In conclusion, we clearly outlined a unique scenario where a human coronavirus and its  
345 closest animal relative share the same high-affinity pattern for both the donor and acceptor  
346 species, indicating the absence of species barriers related to receptor direct binding. At the  
347 spike level, sequence differences between the two viruses account exclusively for global  
348 dynamics and conformational optimization that improved infectivity regardless the host  
349 species. These features rule out the requirement of SARS-CoV-2 adaptation in an  
350 intermediate host; other animal species, if any, have acted as mere vectors in SARS-CoV-2  
351 transfer from bats to humans due to its broad host tropism. Also, they posit the possibility of  
352 other spillover events of SARS-CoV-2-related bat viruses with analogous spike features.

353

354

43

44

45

355

46  
47  
48

16



356 **Materials and methods**

357 RaTG13-associated *affiACE2* allele identification.

358 *R. affinis* ACE2 known coding sequences (GenBank database accession IDs MT394203 to  
359 MT394225) were fed to Sequence Read Archive (SRA) Nucleotide BLAST to retrieve ACE2  
360 Illumina reads from the SRA dataset with accession ID SRX7724752. Reads were assembled  
361 in contigs with Spades (34).

362

363 Generation of plasmid vectors for recombinant protein production.

364 The pCAGGS plasmids for production of the C-terminal His-tagged RBD (#NR\_52310),  
365 were obtained from BEIRESOURCES (NY, USA). The designed codon-optimized sequence  
366 encoding for RaTG13 RBD and the cDNA for *affiACE2* ectodomain (residue 19-615, based  
367 on the sequence deposited on Genbank under the ID MT394225.1) were synthesized by  
368 Genewiz with flanking 5'-BamHI and 3'-NotI restriction sites and sub-cloned into  
369 pUPE.107.03 plasmid vectors (U-Protein Express B.V., The Netherlands) providing the  
370 human cystatin protein signal peptide and C-terminal 6xHis-tag for purification. The cDNA  
371 for hACE2 ectodomain was obtained from AddGene (#141185). The sequence was amplified  
372 using PCR with oligonucleotides hACE2ecto-Fw (5'-  
373 aaaatgatcaTCCACCATTGAGGAACAGGCC-3') and hACE2ecto\_Rv (5'-  
374 aaaagcggccgcGTCTGCATATGGACTCCAGTC-3') and sub-cloned into a pUPE.06.45  
375 expression vector (U-Protein Express B.V., The Netherlands) providing the signal sequence  
376 from cystatin followed by a removable (TEV-cleavable) N-terminal 6xHis-Strep-tag.

377

378 Recombinant Protein Expression and Purification.

379 Recombinant hACE2 ectodomain, *affiACE2* ectodomain, SARS-CoV-2 RBD, and RaTG13  
380 RBD were produced using HEK293-F cells (Invitrogen) cultivated in suspension using

49

50

51

381 Freestyle medium (Invitrogen) as described in (35). Briefly, cells were transfected at a cell  
382 density of 1 million mL<sup>-1</sup> using a mixture of 1 µg of recombinant expression plasmid and 3  
383 µg of polyethyleneimine (PEI; Polysciences, Germany). Cultures were supplemented with  
384 0.6% Primatone RL (Merck) 4 h after transfection. The cell media containing secreted  
385 proteins were collected 6 days after transfection by centrifugation at 1000 × g for 15 min. The  
386 pH and ionic strength of the filtrated medium were adjusted using concentrated phosphate  
387 buffer saline (PBS). Samples were loaded onto a 5 mL His-Trap excel column (Cytiva  
388 biosciences) using a peristaltic pump and then eluted with a 0-250mM imidazole gradient  
389 using a NGC fast protein liquid chromatography (FPLC) system (Bio-Rad). The eluted  
390 samples were subject to immediate concentration with concomitant buffer exchange with  
391 fresh PBS to remove imidazole using Amicon centrifugal filters (Merck). For hACE2, the N-  
392 terminal His-Strep tag was cleaved by incubating the sample with His-tagged TEV protease  
393 for 2 hours at RT, followed by affinity-based sample cleanup using a 5 mL His-Trap excel  
394 column (Cytiva biosciences). Quality control during protein purification was carried out  
395 using reducing and non-reducing SDS-PAGE analysis and differential scanning fluorimetry  
396 (DSF) with a Tycho NT.6 instrument (Nanotemper). All samples were concentrated to 1 mg  
397 mL<sup>-1</sup>, flash-frozen in liquid nitrogen and kept at -80 °C until usage. Prior to analysis, the  
398 protein samples were thawed and subject to gel filtration using a Superdex 200 10/300  
399 increase column (Cytiva lifesciences) equilibrated with 25 mM HEPES/NaOH, 150 mM  
400 NaCl, pH 7.2.

401

#### 402 SPR Binding Analysis.

403 hACE2 or *affi*ACE2 were immobilized on a CMD200M SPR chip (XanTec bioanalytics  
404 GmbH) using a mixed solution of 200 mM 1-ethyl-3-(3-dimethylaminopropyl) carbodiimide

52

53

54

405 hydrochloride (EDC) and 50 mM N-hydroxysuccinimide (NHS) in a Biacore T-200 SPR  
406 instrument (GE Healthcare), reaching 1000 response units (RU). Reactive groups in excess  
407 were blocked with 1 M ethanolamine. The system flow cell 1 was pre-activated and blocked  
408 using the same procedure and used as reference. Twofold dilutions of SARS-CoV-2 RBD or  
409 RaTG13 RBD with concentration ranging from 250 to 7.8 nM were prepared in the running  
410 buffer (25 mM HEPES/NaOH, 150 mM NaCl and 0.05% Tween-20, pH 7.2) and injected  
411 using a flow of 50  $\mu\text{l min}^{-1}$ . Analysis was performed using the Biacore evaluation software  
412 (GE Healthcare) using a 1:1 affinity model.

413

#### 414 Crystallization of RaTG13 RBD/hACE2.

415 RaTG13 RBD and hACE2 were mixed in a molar ratio of 1:1.3 and further subject to gel  
416 filtration using a Superdex 200 10/300 increase column (Cytiva lifesciences) equilibrated  
417 with 25 mM HEPES/NaOH, 150 mM NaCl, pH 7.5. hACE2-RaTG13 RBD crystals of two  
418 different forms were obtained in sitting drop at 25 °C by mixing 0.5  $\mu\text{L}$  of protein complex  
419 concentrated at  $\sim 10 \text{ mg mL}^{-1}$  with 0.5  $\mu\text{L}$  of reservoir solution composed either of 100 mM  
420 Tris/HCl pH 8.5, 20-25% PEG 6000, 100 mM NaCl (crystal form #1) or 0.2-0.25 M sodium  
421 thiocyanate, 18-23% PEG 3350, pH 6,9 (crystal form #2). Crystals were harvested using  
422 MicroMounts Loops (Mitegen), cryo-protected with the mother liquor supplemented with  
423 20% glycerol, flash-cooled and stored in liquid nitrogen prior to data acquisition.

424

#### 425 Diffraction data collection, structure solution and refinement.

426 Diffraction data from hACE2-RaTG13 RBD crystals were collected at the ID23-1 beamline  
427 of the European Synchrotron Radiation Facility (ESRF, Grenoble, FR). Data were integrated  
428 using the automatic *XIA2-DIALS* pipeline available at the beamline outstation and scaled with

55

56

57

429 AIMLESS (36, 37). Data collection statistics are summarized in Table S1. Individual search  
430 models for hACE2 and SARS-CoV-2 RBD molecules were extracted from PDB 6VW1 using  
431 *COOT* and used for molecular replacement with PHASER, yielding complete solutions for both  
432 crystal forms comprising two hACE2 and two RBD molecules in asymmetric unit (38, 39).  
433 Final 3D models were generated using iterations of automatic refinement using low  
434 resolution protocols in *phenix.refine* using non crystallographic symmetry restraints as well  
435 as external restraints based on individual chains from PDB ID 6VW1, alternated with manual  
436 adjustments using *COOT* (40). Assessment of final structure quality was carried out with the  
437 *Molprobtity* server and with the RCSB PDB Validation Server (39, 41). Final refinement  
438 statistics are listed in Table S1.

439

#### 440 Unbiased Spike Simulations.

441 Deglycosylated spike ectodomains (residues 14-1146) were completed, reverted to the wild-  
442 type when needed or mutated with Modeller using the following templates: PDB ID 6ZGF  
443 for RaTG13 closed, PDB ID 6ZGG for all cleaved, 1-up systems, PDB ID 6ZGI for all  
444 cleaved, closed systems, PDB ID 6VYB for all uncleaved, 1-up system and PDB ID 6ZGE  
445 for all uncleaved, closed systems (42). To reconstruct the structure of RaTG13 spike  
446 complexed with hACE2, the final frames of the RaTG13 1-up state and RaTG13  
447 RBD/hACE2 simulations were used as templates in Modeller. All structures were simulated  
448 in an orthorhombic TIP3P water box, neutralized with the proper counterions, and  
449 parametrized using the all-atom AMBER/parm12SB force field (43). All simulations were  
450 performed using the GROMACS 5.1.4 code (44). Periodic boundary conditions in the three  
451 axes were applied. Covalent bond length, including hydrogen bonds, was set using the  
452 LINCS algorithm, allowing a time-integration step of 2 fs. Constant pressure was imposed  
453 using the Parrinello-Rahman barostat with a time constant of 2 ps and a reference pressure of

58

59

60

454 1 bar, while the constant temperature was maintained using the modified Berendsen  
455 thermostat with a time constant of 0.1 ps. Long-range electrostatic interactions were  
456 calculated with the particle mesh Ewald method with a real-space cutoff of 12 Å. Each  
457 system was minimized with the steepest descent algorithm, equilibrated for 100 ps in an NVT  
458 ensemble followed by 100 ps in an NPT ensemble, and then subject to a 200ns simulation at  
459 constant temperature (300 K).

460 RBDs contacts were characterized by calculating inter-protomer dynamic cross-correlation  
461 and contact map (45). RBDs geometry along the trajectories was measured as RBD rotation  
462 ( $\Phi$ ) – calculated as the pseudo-dihedral angle generated by virtually connecting the centers of  
463 mass of RBD, SD1, SD2 and NTD domains as already reported by Henderson *et al.* – and  
464 RBD opening ( $\Psi$ ) – calculated as the angle subtended by two planes, one perpendicular to S2  
465 central  $\alpha$ -helices and passing through residues 1051 C $\alpha$  of the three protomers and the other  
466 through the C $\alpha$  of RBD residues 354, 395 and 401 (46). Residues were chosen for their low  
467 RMSF (root mean square fluctuation) values indicating marked intra-domain stability.

468

#### 469 RBD/ACE2 free energy calculations.

470 We generated by homology modeling with Modeller the 3D atomic structures of the  
471 RBD/ACE2 (boundaries at residues 334-527 and 19-615, respectively) complexes as follows  
472 (42). The atomic structure with PDB ID: 6M17 was used to extract the SARS-CoV-2  
473 RBD/hACE2 complex and as template of SARS-CoV-2 RBD/affiACE2. The crystal structure  
474 of the RaTG13 RBD/hACE2 complex obtained here was used *per se* and as template for  
475 RaTG13 RBD/affiACE2. MD simulation parameters were the same as for the spike systems  
476 and, at the end of the 200 ns run, each system was restarted to produce 10 independent runs  
477 of 10 ns each. Binding free energy was calculated as an average of the 10 independent runs  
478 using the MM/GBSA method corrected as in (50).

61

62

63

479

480 Enhanced sampling MD Spike Simulations.

481 Spike closed-to-1-up and 1-up-to-closed transitions were simulated using the TMD protocol  
482 implemented in Plumed (47). The final frame of each state from the unbiased MD 200ns  
483 trajectory was used as the starting and final points for the corresponding transition simulated  
484 at 300 K. The transitions were driven by applying a linearly increasing spring constant with  $\kappa$   
485 from 0 to 10000 kJoule/mol/nm over 100000000 steps (200ns) exclusively to the C $\alpha$  of the  
486 transitioning protomer structured domains. RBD rotation was simulated using the SMD  
487 protocol implemented in Plumed. SARS-CoV-2 spike structure in the 3-up state fully  
488 engaged by hACE2 monomers (PDB ID: 7A98) was minimized and equilibrated as  
489 previously described and then the three RBDs were driven to the target  $\Phi$  angle by applying a  
490 constant spring with  $\kappa = 10000$  kJoule/mol/nm over 100000000 steps (200 ns).

491 **References and Notes**

492

- 493 1. J. Cui, F. Li, Z.-L. Shi, Origin and evolution of pathogenic coronaviruses. *Nat. Rev.*  
494 *Microbiol.* 2018 173. **17**, 181–192 (2018).
- 495 2. J. Huynh, S. Li, B. Yount, A. Smith, L. Sturges, J. C. Olsen, J. Nagel, J. B. Johnson, S.  
496 Agnihothram, J. E. Gates, M. B. Frieman, R. S. Baric, E. F. Donaldson, Evidence  
497 Supporting a Zoonotic Origin of Human Coronavirus Strain NL63. *J. Virol.* **86**,  
498 12816–12825 (2012).
- 499 3. D. JF, C. VM, D. C, Ecology, evolution and classification of bat coronaviruses in the  
500 aftermath of SARS. *Antiviral Res.* **101**, 45–56 (2014).
- 501 4. E. Petersen, M. Koopmans, U. Go, D. H. Hamer, N. Petrosillo, F. Castelli, M.  
502 Storgaard, S. Al Khalili, L. Simonsen, Comparing SARS-CoV-2 with SARS-CoV and  
503 influenza pandemics. *Lancet Infect. Dis.* **20**, e238–e244 (2020).
- 504 5. P. Zhou, X.-L. Yang, X.-G. Wang, B. Hu, L. Zhang, W. Zhang, H.-R. Si, Y. Zhu, B.  
505 Li, C.-L. Huang, H.-D. Chen, J. Chen, Y. Luo, H. Guo, R.-D. Jiang, M.-Q. Liu, Y.  
506 Chen, X.-R. Shen, X. Wang, X.-S. Zheng, K. Zhao, Q.-J. Chen, F. Deng, L.-L. Liu, B.  
507 Yan, F.-X. Zhan, Y.-Y. Wang, G.-F. Xiao, Z.-L. Shi, A pneumonia outbreak  
508 associated with a new coronavirus of probable bat origin. *Nat.* 2020 5797798. **579**,  
509 270–273 (2020).
- 510 6. S. Tabata, K. Imai, S. Kawano, M. Ikeda, T. Kodama, K. Miyoshi, H. Obinata, S.  
511 Mimura, T. Kadera, M. Kitagaki, M. Sato, S. Suzuki, T. Ito, Y. Uwabe, K. Tamura,  
512 Clinical characteristics of COVID-19 in 104 people with SARS-CoV-2 infection on  
513 the Diamond Princess cruise ship: a retrospective analysis. *Lancet Infect. Dis.* **20**,  
514 1043–1050 (2020).
- 515 7. H. Zhou, J. Ji, X. Chen, Y. Bi, J. Li, Q. Wang, T. Hu, H. Song, R. Zhao, Y. Chen, M.  
516 Cui, Y. Zhang, A. C. Hughes, E. C. Holmes, W. Shi, Identification of novel bat  
517 coronaviruses sheds light on the evolutionary origins of SARS-CoV-2 and related  
518 viruses. *Cell* (2021), doi:10.1016/J.CELL.2021.06.008.
- 519 8. H. Zhou, X. Chen, T. Hu, J. Li, H. Song, Y. Liu, P. Wang, D. Liu, J. Yang, E. C.  
520 Holmes, A. C. Hughes, Y. Bi, W. Shi, A Novel Bat Coronavirus Closely Related to  
521 SARS-CoV-2 Contains Natural Insertions at the S1/S2 Cleavage Site of the Spike  
522 Protein. *Curr. Biol.* **30**, 2196-2203.e3 (2020).
- 523 9. T. T.-Y. Lam, N. Jia, Y.-W. Zhang, M. H.-H. Shum, J.-F. Jiang, H.-C. Zhu, Y.-G.  
524 Tong, Y.-X. Shi, X.-B. Ni, Y.-S. Liao, W.-J. Li, B.-G. Jiang, W. Wei, T.-T. Yuan, K.  
525 Zheng, X.-M. Cui, J. Li, G.-Q. Pei, X. Qiang, W. Y.-M. Cheung, L.-F. Li, F.-F. Sun, S.  
526 Qin, J.-C. Huang, G. M. Leung, E. C. Holmes, Y.-L. Hu, Y. Guan, W.-C. Cao,

67

68

69

- 527 Identifying SARS-CoV-2-related coronaviruses in Malayan pangolins. *Nat.* 2020  
528 5837815. **583**, 282–285 (2020).
- 529 10. G. XY, W. N, Z. W, H. B, L. B, Z. YZ, Z. JH, L. CM, Y. XL, W. LJ, W. B, Z. Y, L.  
530 ZX, S. ZL, Coexistence of multiple coronaviruses in several bat colonies in an  
531 abandoned mineshaft. *Viol. Sin.* **31**, 31–40 (2016).
- 532 11. R. Yan, Y. Zhang, Y. Li, L. Xia, Y. Guo, Q. Zhou, Structural basis for the recognition  
533 of SARS-CoV-2 by full-length human ACE2. *Science (80-. )*. **367**, 1444–1448 (2020).
- 534 12. J. Shang, G. Ye, K. Shi, Y. Wan, C. Luo, H. Aihara, Q. Geng, A. Auerbach, F. Li,  
535 Structural basis of receptor recognition by SARS-CoV-2. *Nat. 2020 5817807*. **581**,  
536 221–224 (2020).
- 537 13. A. G. Wrobel, D. J. Benton, P. Xu, C. Roustan, S. R. Martin, P. B. Rosenthal, J. J.  
538 Skehel, S. J. Gamblin, SARS-CoV-2 and bat RaTG13 spike glycoprotein structures  
539 inform on virus evolution and furin-cleavage effects. *Nat. Struct. Mol. Biol.* 2020 278.  
540 **27**, 763–767 (2020).
- 541 14. WHO-convened global study of origins of SARS-CoV-2: China Part, (available at  
542 [https://www.who.int/publications/i/item/who-convened-global-study-of-origins-of-](https://www.who.int/publications/i/item/who-convened-global-study-of-origins-of-sars-cov-2-china-part)  
543 [sars-cov-2-china-part](https://www.who.int/publications/i/item/who-convened-global-study-of-origins-of-sars-cov-2-china-part)).
- 544 15. H. Guo, B.-J. Hu, X.-L. Yang, L.-P. Zeng, B. Li, S. Ouyang, Z.-L. Shi, Evolutionary  
545 Arms Race between Virus and Host Drives Genetic Diversity in Bat Severe Acute  
546 Respiratory Syndrome-Related Coronavirus Spike Genes. *J. Virol.* **94** (2020),  
547 doi:10.1128/JVI.00902-20.
- 548 16. G. E. Crooks, G. Hon, J.-M. Chandonia, S. E. Brenner, WebLogo: A Sequence Logo  
549 Generator. *Genome Res.* **14**, 1188 (2004).
- 550 17. Y. C. Wong, S. Y. Lau, K. K. Wang To, B. W. Y. Mok, X. Li, P. Wang, S. Deng, K. F.  
551 Woo, Z. Du, C. Li, J. Zhou, J. F. W. Chan, K. Y. Yuen, H. Chen, Z. Chen, Natural  
552 Transmission of Bat-like Severe Acute Respiratory Syndrome Coronavirus 2 Without  
553 Proline-Arginine-Arginine-Alanine Variants in Coronavirus Disease 2019 Patients.  
554 *Clin. Infect. Dis.* **73**, e437–e444 (2021).
- 555 18. T. P. Peacock, D. H. Goldhill, J. Zhou, L. Baillon, R. Frise, O. C. Swann, R.  
556 Kugathasan, R. Penn, J. C. Brown, R. Y. Sanchez-David, L. Braga, M. K. Williamson,  
557 J. A. Hassard, E. Staller, B. Hanley, M. Osborn, M. Giacca, A. D. Davidson, D. A.  
558 Matthews, W. S. Barclay, The furin cleavage site in the SARS-CoV-2 spike protein is  
559 required for transmission in ferrets. *Nat. Microbiol.* 2021 67. **6**, 899–909 (2021).
- 560 19. B. A. Johnson, X. Xie, A. L. Bailey, B. Kalveram, K. G. Lokugamage, A. Muruato, J.  
561 Zou, X. Zhang, T. Juelich, J. K. Smith, L. Zhang, N. Bopp, C. Schindewolf, M. Vu, A.  
562 Vanderheiden, E. S. Winkler, D. Swetnam, J. A. Plante, P. Aguilar, K. S. Plante, V.  
563 Popov, B. Lee, S. C. Weaver, M. S. Suthar, A. L. Routh, P. Ren, Z. Ku, Z. An, K.

70

71

72



- 564 Debbink, M. S. Diamond, P.-Y. Shi, A. N. Freiberg, V. D. Menachery, Loss of furin  
565 cleavage site attenuates SARS-CoV-2 pathogenesis. *Nat. 2021 5917849*. **591**, 293–299  
566 (2021).
- 567 20. D. J. Benton, A. G. Wrobel, P. Xu, C. Roustan, S. R. Martin, P. B. Rosenthal, J. J.  
568 Skehel, S. J. Gamblin, Receptor binding and priming of the spike protein of SARS-  
569 CoV-2 for membrane fusion. *Nat. 2020 5887837*. **588**, 327–330 (2020).
- 570 21. Y. R, Z. Y, L. Y, Y. F, G. Y, X. L, Z. X, C. X, Z. Q, Structural basis for the different  
571 states of the spike protein of SARS-CoV-2 in complex with ACE2. *Cell Res.* **31**, 717–  
572 719 (2021).
- 573 22. M. Castelli, A. Baj, E. Criscuolo, R. Ferrarese, R. A. Diotti, M. Sampaolo, F. Novazzi,  
574 D. D. Gasperina, D. Focosi, D. Ferrari, M. Locatelli, M. Clementi, N. Clementi, F.  
575 Maggi, N. Mancini, Characterization of a Lineage C.36 SARS-CoV-2 Isolate with  
576 Reduced Susceptibility to Neutralization Circulating in Lombardy, Italy. *Viruses 2021*,  
577 *Vol. 13, Page 1514*. **13**, 1514 (2021).
- 578 23. Y. Wu, S. Zhao, Furin cleavage sites naturally occur in coronaviruses. *Stem Cell Res.*  
579 **50**, 102115 (2021).
- 580 24. A. SJ, J. CK, G. DJ, K. S, C. X, W. H, H. AL, J. DO, W. ND, D. P, K. W, L. WI, M.  
581 SS, M. JAK, G. T, Global patterns in coronavirus diversity. *Virus Evol.* **3** (2017),  
582 doi:10.1093/VE/VEX012.
- 583 25. Q. Wang, J. Qi, Y. Yuan, Y. Xuan, P. Han, Y. Wan, W. Ji, Y. Li, Y. Wu, J. Wang, A.  
584 Iwamoto, P. C. Y. Woo, K. Y. Yuen, J. Yan, G. Lu, G. F. Gao, Bat Origins of MERS-  
585 CoV Supported by Bat Coronavirus HKU4 Usage of Human Receptor CD26. *Cell*  
586 *Host Microbe.* **16**, 328–337 (2014).
- 587 26. X. Y. Ge, J. L. Li, X. Lou Yang, A. A. Chmura, G. Zhu, J. H. Epstein, J. A. Mazet, B.  
588 Hu, W. Zhang, C. Peng, Y. J. Zhang, C. M. Luo, B. Tan, N. Wang, Y. Zhu, G.  
589 Cramer, S. Y. Zhang, L. F. Wang, P. Daszak, Z. L. Shi, Isolation and characterization  
590 of a bat SARS-like coronavirus that uses the ACE2 receptor. *Nature.* **503**, 535–538  
591 (2013).
- 592 27. Y. H, J. H, L. Q, Z. Z, X. Q, W. BJ, W. X, G. M, W. LF, L. K, C. Y, Z. H, ACE2  
593 receptor usage reveals variation in susceptibility to SARS-CoV and SARS-CoV-2  
594 infection among bat species. *Nat. Ecol. Evol.* **5**, 600–608 (2021).
- 595 28. L. Wu, Q. Chen, K. Liu, J. Wang, P. Han, Y. Zhang, Y. Hu, Y. Meng, X. Pan, C. Qiao,  
596 S. Tian, P. Du, H. Song, W. Shi, J. Qi, H.-W. Wang, J. Yan, G. F. Gao, Q. Wang,  
597 Broad host range of SARS-CoV-2 and the molecular basis for SARS-CoV-2 binding to  
598 cat ACE2. *Cell Discov.* **2020 61**. **6**, 1–12 (2020).
- 599 29. Z. Zhang, Y. Zhang, K. Liu, Y. Li, Q. Lu, Q. Wang, Y. Zhang, L. Wang, H. Liao, A.  
600 Zheng, S. Ma, Z. Fan, H. Li, W. Huang, Y. Bi, X. Zhao, Q. Wang, G. F. Gao, H. Xiao,

73

74

75

- 601 Z. Tong, J. Qi, Y. Sun, The molecular basis for SARS-CoV-2 binding to dog ACE2.  
602 *Nat. Commun.* 2021 121. **12**, 1–10 (2021).
- 603 30. K. Liu, S. Tan, S. Niu, J. Wang, L. Wu, H. Sun, Y. Zhang, X. Pan, X. Qu, P. Du, Y.  
604 Meng, Y. Jia, Q. Chen, C. Deng, J. Yan, H.-W. Wang, Q. Wang, J. Qi, G. F. Gao,  
605 Cross-species recognition of SARS-CoV-2 to bat ACE2. *Proc. Natl. Acad. Sci.* **118**  
606 (2021), doi:10.1073/PNAS.2020216118.
- 607 31. S. Ghosh, T. A. Dellibovi-Ragheb, A. Kerviel, E. Pak, Q. Qiu, M. Fisher, P. M.  
608 Takvorian, C. Bleck, V. W. Hsu, A. R. Fehr, S. Perlman, S. R. Achar, M. R. Straus, G.  
609 R. Whittaker, C. A. M. de Haan, J. Kehrl, G. Altan-Bonnet, N. Altan-Bonnet,  $\beta$ -  
610 Coronaviruses Use Lysosomes for Egress Instead of the Biosynthetic Secretory  
611 Pathway. *Cell.* **183**, 1520-1535.e14 (2020).
- 612 32. X. Li, E. E. Giorgi, M. H. Marichannegowda, B. Foley, C. Xiao, X.-P. Kong, Y. Chen,  
613 S. Gnanakaran, B. Korber, F. Gao, Emergence of SARS-CoV-2 through recombination  
614 and strong purifying selection. *Sci. Adv.* **6**, eabb9153 (2020).
- 615 33. A. Flores-Alanis, L. Sandner-Miranda, G. Delgado, A. Cravioto, R. Morales-Espinosa,  
616 The receptor binding domain of SARS-CoV-2 spike protein is the result of an ancestral  
617 recombination between the bat-CoV RaTG13 and the pangolin-CoV MP789. *BMC*  
618 *Res. Notes.* **13** (2020), doi:10.1186/S13104-020-05242-8.
- 619 34. B. A, N. S, A. D, G. AA, D. M, K. AS, L. VM, N. SI, P. S, P. AD, P. AV, S. AV, V.  
620 N, T. G, A. MA, P. PA, SPAdes: a new genome assembly algorithm and its  
621 applications to single-cell sequencing. *J. Comput. Biol.* **19**, 455–477 (2012).
- 622 35. F. S, C. M, P. M, C. A, C. A, F. F, Optimized Recombinant Production of Secreted  
623 Proteins Using Human Embryonic Kidney (HEK293) Cells Grown in Suspension. *Bio-*  
624 *protocol.* **11** (2021), doi:10.21769/BIOPROTOCOL.3998.
- 625 36. M. S, G. E, B. MW, D. S, G. M, S. D, S. O, M. SM, M. AA, L. G, N. MH, Automatic  
626 processing of macromolecular crystallography X-ray diffraction data at the ESRF. *J.*  
627 *Appl. Crystallogr.* **46**, 804–810 (2013).
- 628 37. E. PR, M. GN, How good are my data and what is the resolution? *Acta Crystallogr. D.*  
629 *Biol. Crystallogr.* **69**, 1204–1214 (2013).
- 630 38. E. P, L. B, S. WG, C. K, Features and development of Coot. *Acta Crystallogr. D. Biol.*  
631 *Crystallogr.* **66**, 486–501 (2010).
- 632 39. W. CJ, H. JJ, M. NW, P. MG, V. LL, D. LN, V. V, K. DA, H. BJ, C. VB, J. S, L. SM,  
633 A. WB, S. J, A. PD, L. SC, R. JS, R. DC, MolProbity: More and better reference data  
634 for improved all-atom structure validation. *Protein Sci.* **27**, 293–315 (2018).

- 635 40. A. PV, G.-K. RW, E. N, H. JJ, M. NW, M. M, T. TC, U. A, Z. PH, A. PD, Towards  
636 automated crystallographic structure refinement with phenix.refine. *Acta Crystallogr.*  
637 *D. Biol. Crystallogr.* **68**, 352–367 (2012).
- 638 41. G. S, S. G. E, H. PMS, G. A, W. JD, Y. H, F. Z, B. K, B. JM, H. BP, I. Y, K. N, L. CL,  
639 M. S, M. L, M. A, O. TJ, P. A, P. E, S. G, S. MR, S. S, S. C, S. OS, U. EL, Y. R, Q.  
640 M, Y. JY, N. H, M. JL, B. HM, B. SK, V. S, K. GJ, Validation of Structures in the  
641 Protein Data Bank. *Structure.* **25**, 1916–1927 (2017).
- 642 42. W. B, S. A, *Curr. Protoc. Bioinforma.*, in press, doi:10.1002/CPBI.3.
- 643 43. J. A. Maier, C. Martinez, K. Kasavajhala, L. Wickstrom, K. E. Hauser, C. Simmerling,  
644 ff14SB: Improving the Accuracy of Protein Side Chain and Backbone Parameters from  
645 ff99SB. *J. Chem. Theory Comput.* **11**, 3696–3713 (2015).
- 646 44. M. J. Abraham, T. Murtola, R. Schulz, S. Páll, J. C. Smith, B. Hess, E. Lindah,  
647 GROMACS: High performance molecular simulations through multi-level parallelism  
648 from laptops to supercomputers. *SoftwareX.* **1–2**, 19–25 (2015).
- 649 45. D. K. Brown, D. L. Penkler, O. S. Amamuddy, C. Ross, A. R. Atilgan, C. Atilgan, Ö.  
650 T. Bishop, MD-TASK: a software suite for analyzing molecular dynamics trajectories.  
651 *Bioinformatics.* **33**, 2768 (2017).
- 652 46. R. Henderson, R. J. Edwards, K. Mansouri, K. Janowska, V. Stalls, S. M. C. Gobeil,  
653 M. Kopp, D. Li, R. Parks, A. L. Hsu, M. J. Borgnia, B. F. Haynes, P. Acharya,  
654 Controlling the SARS-CoV-2 spike glycoprotein conformation. *Nat. Struct. Mol. Biol.*  
655 **27**, 925–933 (2020).
- 656 47. G. A. Tribello, M. Bonomi, D. Branduardi, C. Camilloni, G. Bussi, PLUMED 2: New  
657 feathers for an old bird. *Comput. Phys. Commun.* **185**, 604–613 (2014).
- 658 48. K. PA, D. K, Linking crystallographic model and data quality. *Science.* **336**, 1030–  
659 1033 (2012).
- 660 49. K. Liu, X. Pan, L. Li, F. Yu, A. Zheng, P. Du, P.g Han, Y. Meng, Y. Zhang, L. Wu,  
661 Q. Chen, C. Song, Y. Jia, S. Niu, D. Lu, C. Qiao, Z. Chen, D. Ma, X. Ma, S. Tan, X.  
662 Zhao, J. Qi, G. F. Gao, and Q. Wang, Binding and molecular basis of the bat  
663 coronavirus RaTG13 virus to ACE2 in humans and other species . *Cell.* **184**, 3438-3  
664 451.e10 (2021)
- 665 50. K. Huang, S. Luo, Y. Cong, S. Zhong, J. Z. H. Zhan, L. Duan, An accurate free  
666 energy estimator: based on MM/PBSA combined with interaction entropy for protein–  
667 ligand binding affinity. *Nanoscale.* **12(19)**: 10737-50 (2020)

## 668 **Acknowledgements**

669 We thank Mr. Matteo De Marco for their assistance in molecular cloning and biophysical  
670 analyses, and scientists from ARDIS SRL for useful discussions on SPR data processing. We  
671 thank Dr. Stefano Iula for useful discussion on geometric measurements. We thank  
672 FSTechnology SpA for providing part of the computational resources. We thank the  
673 European Synchrotron Radiation Facility (ESRF) for the provision of synchrotron radiation  
674 facilities and for the excellent support provided by the ESRF beamline scientists during  
675 remote data collection sessions. The following reagents were produced under  
676 HHSN272201400008C and obtained through BEI Resources, NIAID, NIH: Vector pCAGGS  
677 Containing the SARS-Related Coronavirus 2, Wuhan-Hu-1 Spike Glycoprotein Gene, NR-  
678 52310; Vector pCAGGS Containing the SARS-Related Coronavirus 2, Wuhan-Hu-1 Spike  
679 Glycoprotein Receptor Binding Domain (RBD), NR-52309.

680

## 681 **Funding**

682 Research in the Forneris Lab is supported by Fondazione Giovanni Armenise-Harvard  
683 (CDA2013 to FF), the Italian Association for Cancer Research (AIRC, “My First AIRC  
684 Grant” id. 20075 to FF), the Mizutani Foundation for Glycoscience (grant id. 200039 to FF),  
685 the NATO Science for Peace and Security Program (grant id. SPS G5701 to FF), Velux  
686 Stiftung (grant id. 1375 to FF), the Italian Ministry of Education, University and Research  
687 (MIUR) (grant id. PRIN2017RPHBCW\_001 to FF and Dipartimenti di Eccellenza Program  
688 2018–2022, to the Dept. of Biology and Biotechnology "L. Spallanzani", University of  
689 Pavia). None of the funding sources had roles in study design, collection, analysis and  
690 interpretation of data, in the writing of the report and in the decision to submit this article for  
691 publication.

692

82

83

84

693 **Author contributions**

694 Conceptualization: MCas, LS, NC, FF, NM

695 Methodology: MCas, LS, MCav, NC, FF, NM

696 Investigation: MCas, LS, MCav, SF, AP, EC, RAD

697 Visualization: MCas, LS, MCav, FF

698 Funding acquisition: FF

699 Project administration: MCas, LS, FF, NM

700 Supervision: MCl, FF, NM

701 Writing – original draft: MCas, LS

702 Writing – review & editing: MCas, LS, NC, MCl, FF, NM

703

704 **Competing interests**

705 Authors declare that they have no competing interests.

706

707 **Data and materials availability**

708 Coordinates and structure factors for the RaTG13 RBD/hACE2 complex have been deposited  
709 in the Protein Data Bank under accession codes 7P8I (crystal form I) and 7P8J (crystal form  
710 II).

711

712

713

85

86

87

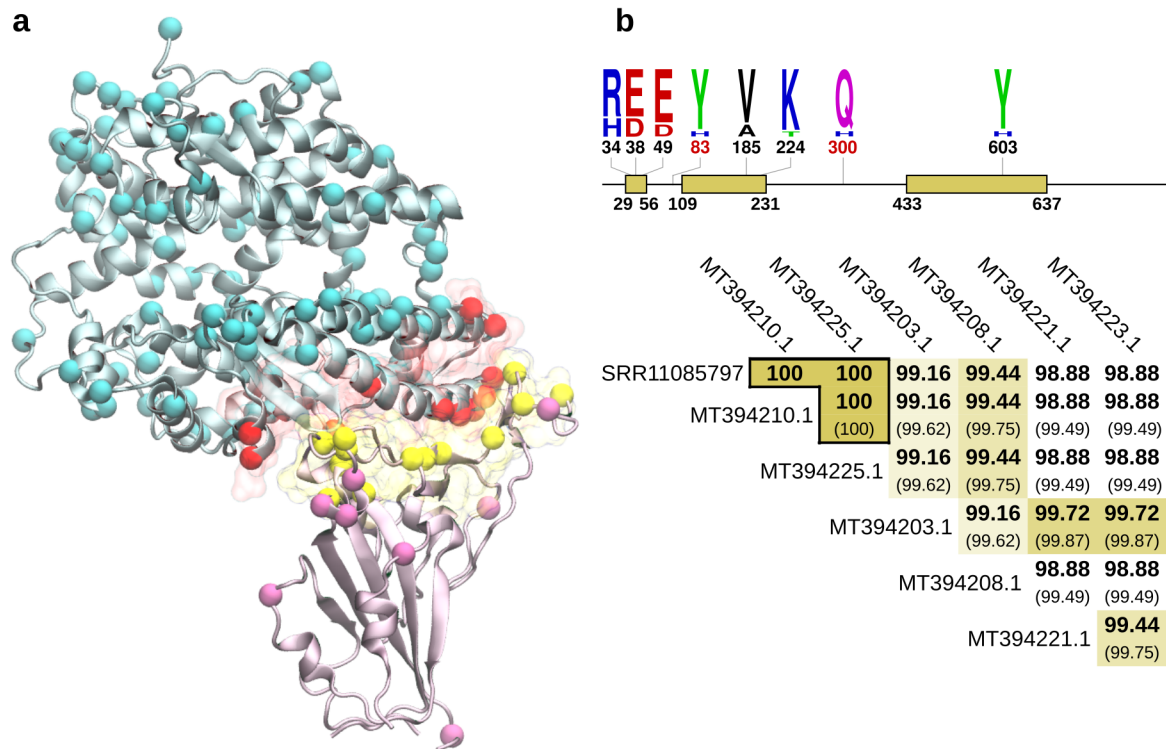

715

716 **Figure 1. RBD/ACE2 comparison and *affi*ACE2 allele identification.** (a) Amino acid  
 717 differences of RaTG13/SARS-CoV-2 RBD and *affi*ACE2/hACE2. Proteins are depicted in  
 718 ribbon, with the RBD/ACE2 binding interface at 8 Å in yellow and red transparent surface,  
 719 respectively. Amino acid differences are depicted as spheres colored according to the  
 720 distance from the binding interface: RBD and ACE2 mutations below 8 Å are in yellow and  
 721 red, mutations above 8 Å in purple and cyan, respectively. (b) Identification of *affi*ACE2  
 722 allele associated to RaTG13. The regions of *affi*ACE2 mRNA covered by SRA reads from  
 723 dataset SRR11085797 are depicted as yellow bars in the upper panel. Polymorphic sites and  
 724 relative frequencies were generated with WebLogo (16). Sites not covered by SRA reads are  
 725 reported in red. Amino acid identity percentage considering covered regions (in bold) or the  
 726 entire deposited sequences (in brackets) are reported in the lower panel. Identical sequences

88

89

90

727 were collapsed into a single representative. The full comparison of all deposited *affiACE2*  
728 sequences is reported in Figure S2.

729

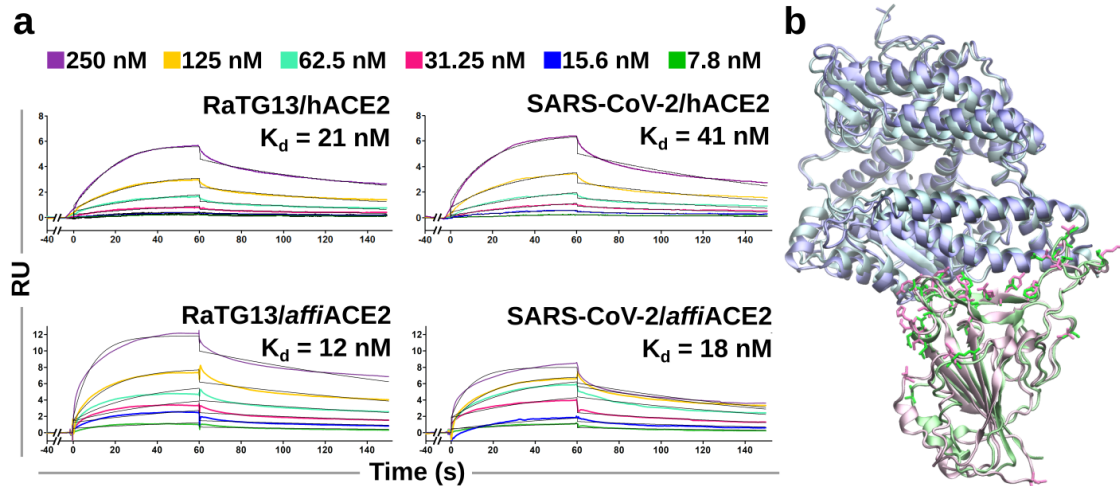

731 **Figure 2. RBD/ACE2 binding affinity and structure. (a)** Surface plasmon resonance  
732 measurements. Blank subtracted sensograms (black curves) of the RaTG13 and SARS-CoV-2  
733 RBDs on immobilized hACE2 and *affi*ACE2. A 1:1 binding model was used for data fitting.  
734 Shown data are the mean of four replicates. **(b)** Structure comparison of SARS-CoV-2 (PDB  
735 ID: 6M17) and RaTG13 (reported here) RBD/hACE2 complexes. Whole structures are  
736 depicted in ribbon, hACE2, RaTG13 RBD and SARS-CoV-2 RBD are colored in shades of  
737 blue, pink and green, respectively. The side chain of RaTG13/SARS-CoV-2 mutations are  
738 reported in licorice.  
739



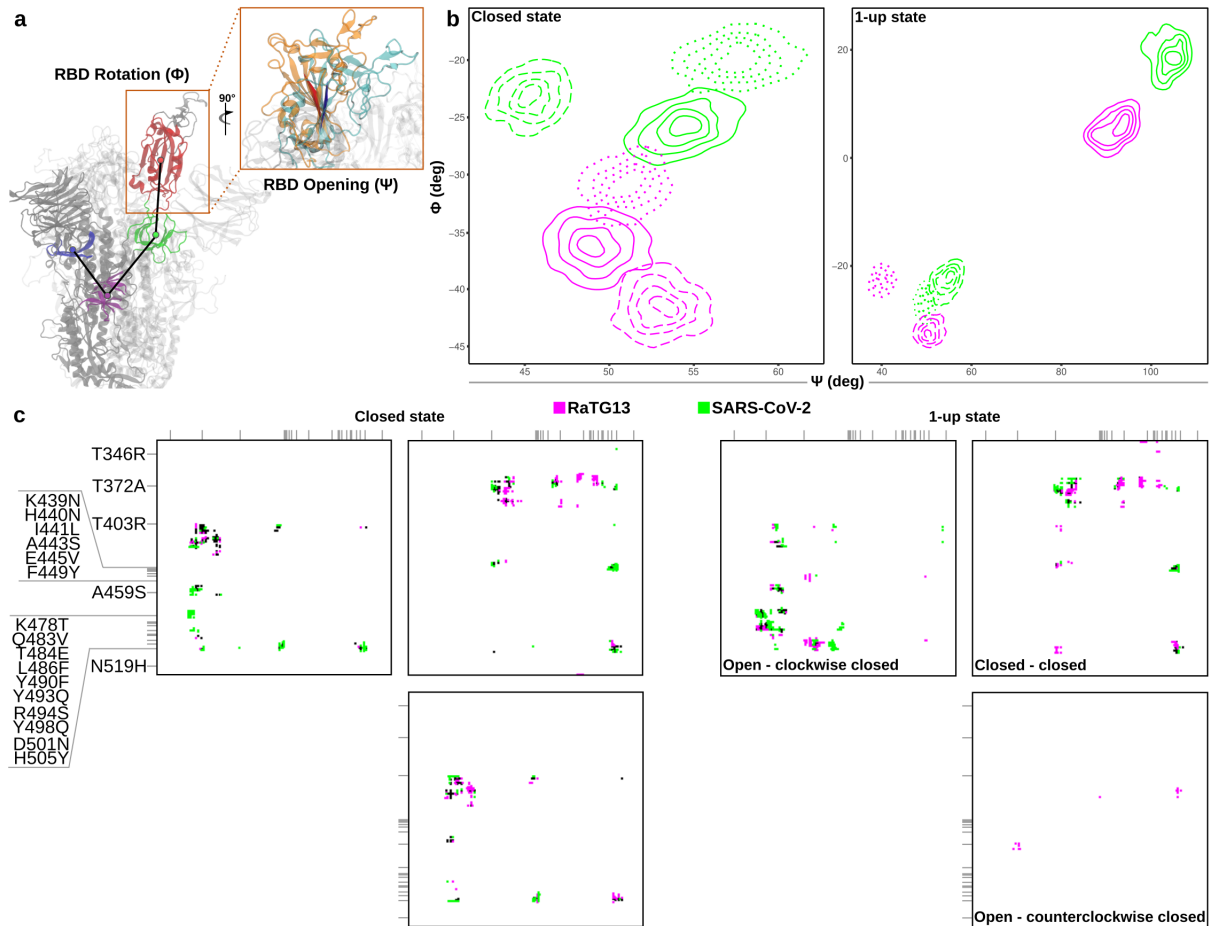

741 **Figure 3. RBD interactions and geometry.** (a) Definition of the dihedral and angle  
 742 representative of RBD opening ( $\Psi$ ) and rotation ( $\Phi$ ), respectively. (b) Contour plot of RBDs  
 743 angles of uncleaved SARS-CoV-2 and RaTG13 spikes in the closed and 1-up states  
 744 calculated along MD simulations. In the 1-up state graph, solid lines represent the open  
 745 RBDs, dashed and dotted lines the closed RBDs. (c) RBD-RBD average contact map  
 746 calculated along MD simulations. Purple and green black spots indicates contacts specific for  
 747 RaTG13 or SARS-CoV-2, black spots indicate shared contacts. RaTG13/SARS-CoV-2  
 748 mutations are reported on the axes.

749

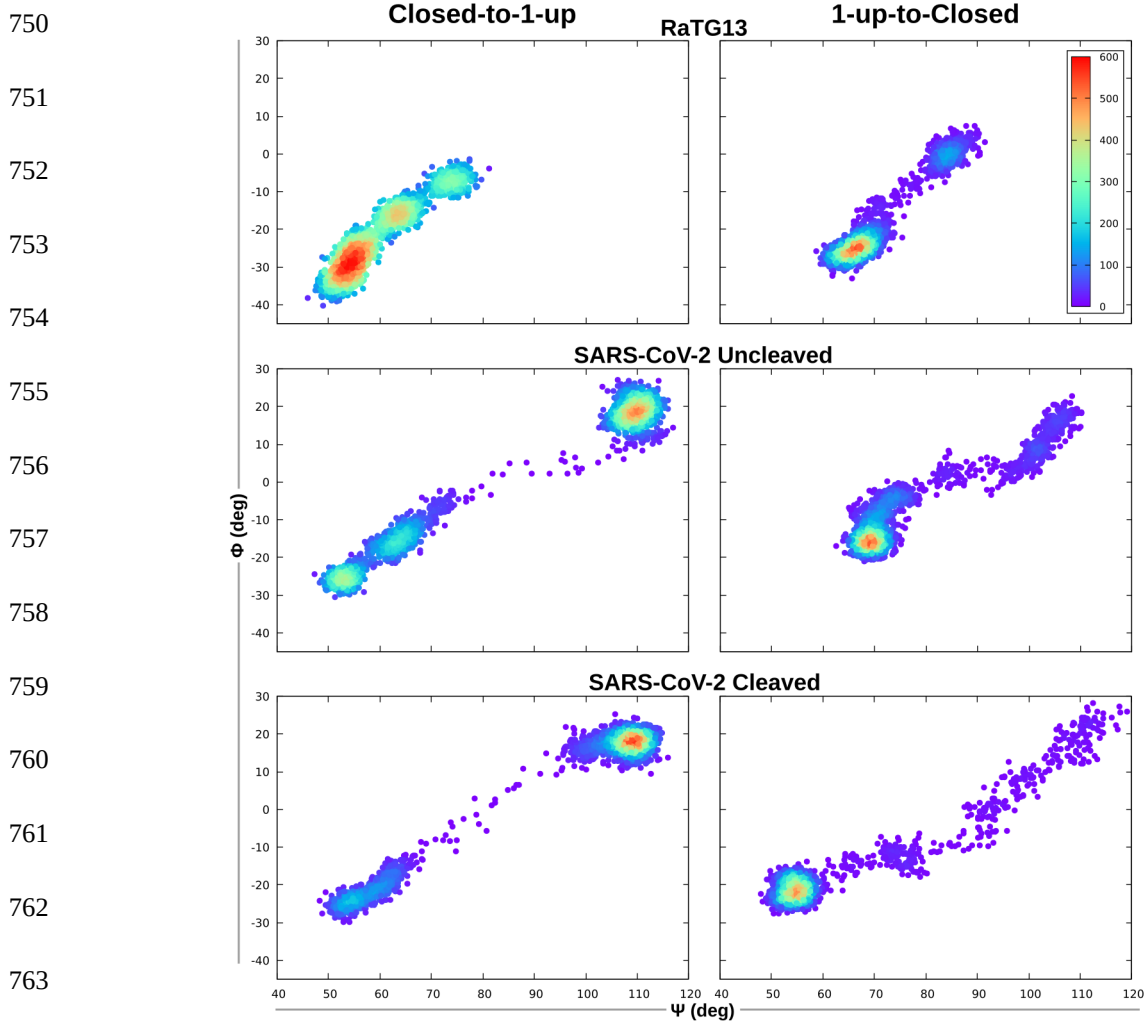

765 **Figure 4. RBD transitions.**

766 TMD simulations of RBD opening/closing. The transitions are monitored considering the  $\Psi$   
767 and  $\Phi$  angles of the transitioning RBD and plotted as a function of density.

768

100  
101  
102

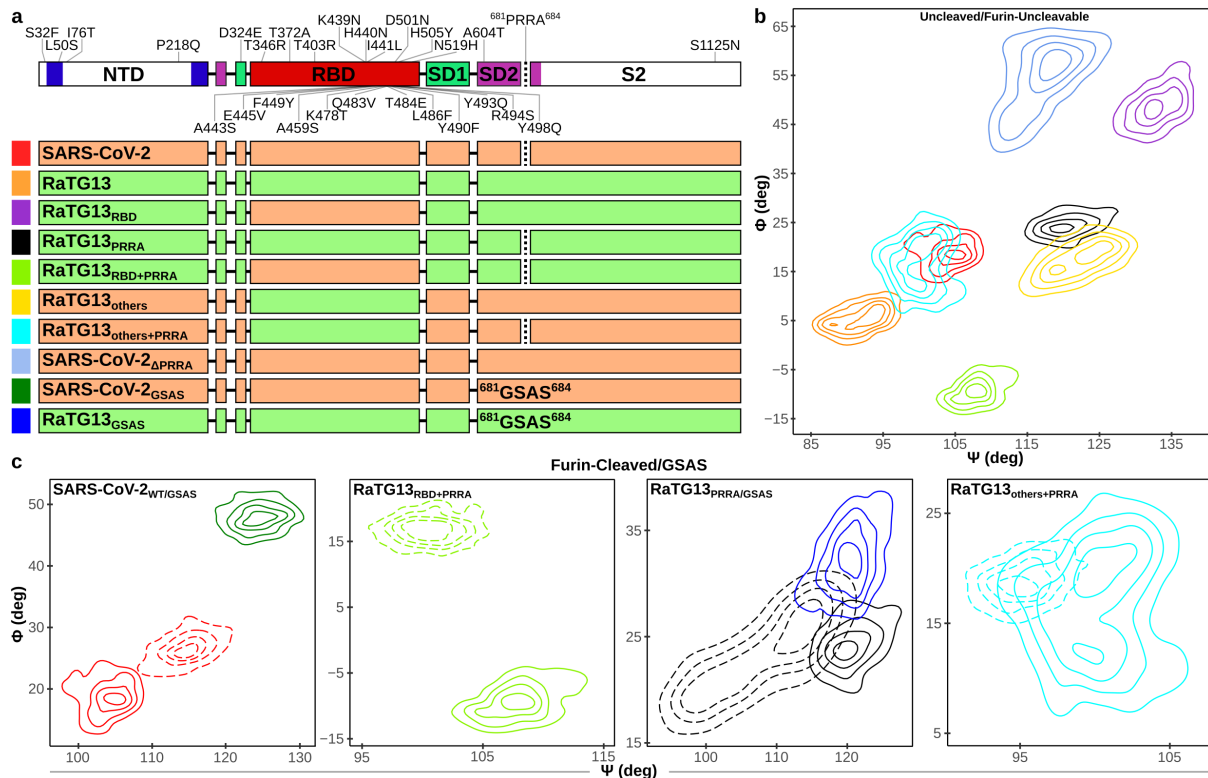

770 **Figure 5. RBD geometry of hybrid spikes.** (a) Scheme reporting all mutations/insertions  
 771 from RaTG13 to SARS-CoV-2. The spike is divided into the relevant domains. Color code is  
 772 the same as in Figure 2a. The green and orange bars below indicate the domains that were  
 773 swapped among the different hybrid systems, color boxes on the left are the same as in panel  
 774 B and C. (b) Contour plot of the open RBDs  $\Psi$  and  $\Phi$  angles of uncleaved/furin-uncleavable  
 775 spike hybrid systems. (c) Contour plot of the open RBDs  $\Psi$  and  $\Phi$  angles of cleaved and  
 776 GSAS systems. Solid and dashed lines of the same color represent the uncleaved and cleaved  
 777 form of the same system, respectively.

778

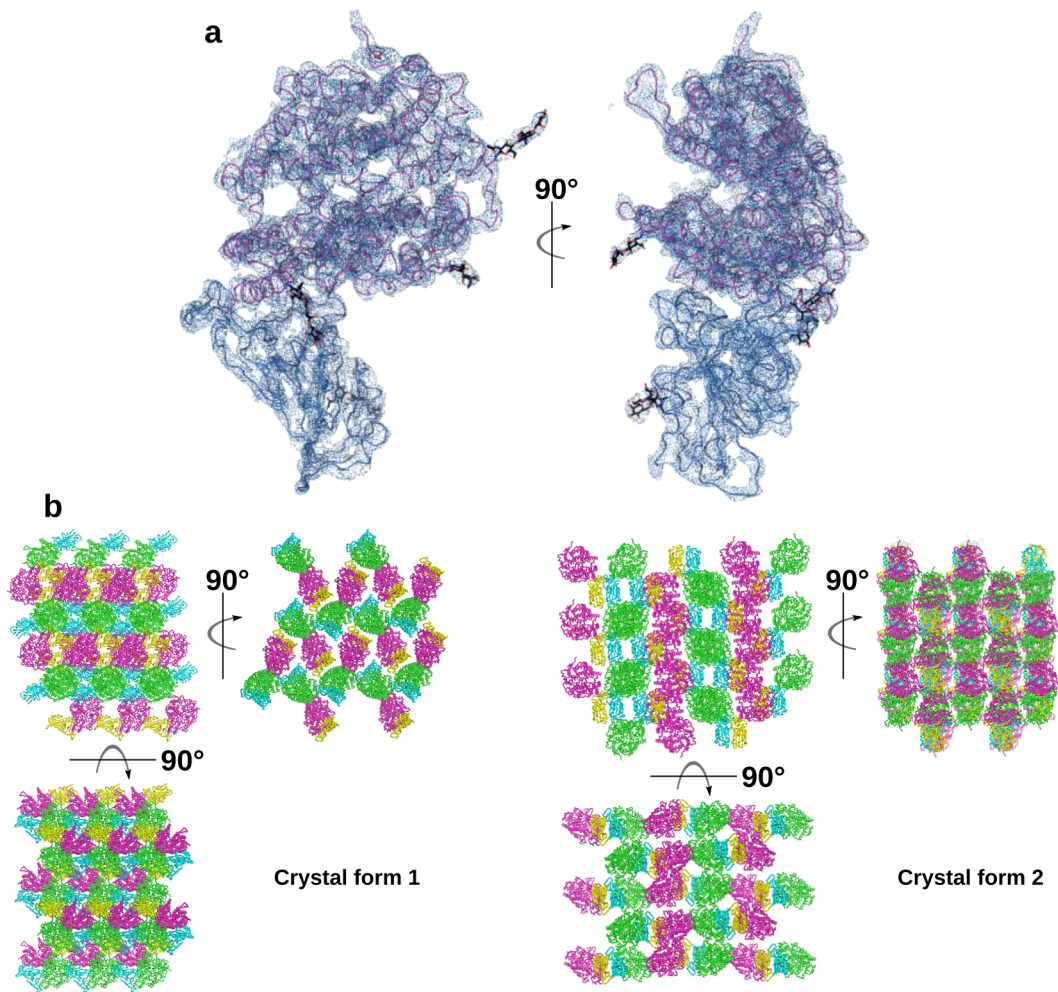

**Figure S1. X-ray crystallography of RaTG13 RBD/hACE2 complex.**

(a) Refined 2Fo-Fc electron density maps (contour level 1.1) covering RaTG13 RBD/hACE2 complex (in blue and pink, respectively).

(b) Crystal packing.

|             | SRR11085797 | MT394210.1 | MT394225.1 | MT394203.1 | MT394204.1 | MT394205.1 | MT394206.1 | MT394207.1 | MT394208.1 | MT394209.1 | MT394211.1 | MT394212.1 | MT394213.1 | MT394214.1 | MT394215.1 | MT394216.1 | MT394217.1 | MT394218.1 | MT394219.1 | MT394220.1 | MT394221.1 | MT394222.1 | MT394223.1 | MT394224.1 |
|-------------|-------------|------------|------------|------------|------------|------------|------------|------------|------------|------------|------------|------------|------------|------------|------------|------------|------------|------------|------------|------------|------------|------------|------------|------------|
| SRR11085797 | <b>100</b>  | <b>100</b> | <b>100</b> | 99.16      | 99.16      | 99.16      | 99.16      | 99.16      | 99.44      | 99.16      | 99.16      | 99.16      | 99.16      | 99.16      | 99.16      | 99.16      | 99.16      | 99.16      | 99.16      | 99.16      | 99.16      | 99.16      | 99.16      | 99.16      |
| MT394210.1  | <b>100</b>  | <b>100</b> | <b>100</b> | 99.16      | 99.16      | 99.16      | 99.16      | 99.16      | 99.44      | 99.16      | 99.16      | 99.16      | 99.16      | 99.16      | 99.16      | 99.16      | 99.16      | 99.16      | 99.16      | 99.16      | 99.16      | 99.16      | 99.16      | 99.16      |
| MT394225.1  | <b>100</b>  | <b>100</b> | <b>100</b> | 99.16      | 99.16      | 99.16      | 99.16      | 99.16      | 99.44      | 99.16      | 99.16      | 99.16      | 99.16      | 99.16      | 99.16      | 99.16      | 99.16      | 99.16      | 99.16      | 99.16      | 99.16      | 99.16      | 99.16      | 99.16      |
| MT394203.1  | (100)       | (100)      | (100)      | (99.62)    | (99.62)    | (99.62)    | (99.62)    | (99.62)    | (99.75)    | (99.62)    | (99.62)    | (99.49)    | (99.62)    | (99.49)    | (99.62)    | (99.62)    | (99.62)    | (99.62)    | (99.62)    | (99.62)    | (99.62)    | (99.62)    | (99.62)    | (99.62)    |
| MT394204.1  | (100)       | (100)      | (100)      | (100)      | (100)      | (100)      | (100)      | (100)      | (99.62)    | (100)      | (100)      | (99.87)    | (100)      | (99.87)    | (100)      | (100)      | (100)      | (100)      | (100)      | (100)      | (100)      | (100)      | (100)      | (100)      |
| MT394205.1  | (100)       | (100)      | (100)      | (100)      | (100)      | (100)      | (100)      | (100)      | (99.62)    | (100)      | (100)      | (99.87)    | (100)      | (99.87)    | (100)      | (100)      | (100)      | (100)      | (100)      | (100)      | (100)      | (100)      | (100)      | (100)      |
| MT394206.1  | (100)       | (100)      | (100)      | (100)      | (100)      | (100)      | (100)      | (100)      | (99.62)    | (100)      | (100)      | (99.87)    | (100)      | (99.87)    | (100)      | (100)      | (100)      | (100)      | (100)      | (100)      | (100)      | (100)      | (100)      | (100)      |
| MT394207.1  | (100)       | (100)      | (100)      | (100)      | (100)      | (100)      | (100)      | (100)      | (99.62)    | (100)      | (100)      | (99.87)    | (100)      | (99.87)    | (100)      | (100)      | (100)      | (100)      | (100)      | (100)      | (100)      | (100)      | (100)      | (100)      |
| MT394208.1  | (100)       | (100)      | (100)      | (100)      | (100)      | (100)      | (100)      | (100)      | (99.62)    | (100)      | (100)      | (99.87)    | (100)      | (99.87)    | (100)      | (100)      | (100)      | (100)      | (100)      | (100)      | (100)      | (100)      | (100)      | (100)      |
| MT394209.1  | (100)       | (100)      | (100)      | (100)      | (100)      | (100)      | (100)      | (100)      | (99.62)    | (100)      | (100)      | (99.87)    | (100)      | (99.87)    | (100)      | (100)      | (100)      | (100)      | (100)      | (100)      | (100)      | (100)      | (100)      | (100)      |
| MT394211.1  | (100)       | (100)      | (100)      | (100)      | (100)      | (100)      | (100)      | (100)      | (99.62)    | (100)      | (100)      | (99.87)    | (100)      | (99.87)    | (100)      | (100)      | (100)      | (100)      | (100)      | (100)      | (100)      | (100)      | (100)      | (100)      |
| MT394212.1  | (100)       | (100)      | (100)      | (100)      | (100)      | (100)      | (100)      | (100)      | (99.62)    | (100)      | (100)      | (99.87)    | (100)      | (99.87)    | (100)      | (100)      | (100)      | (100)      | (100)      | (100)      | (100)      | (100)      | (100)      | (100)      |
| MT394213.1  | (100)       | (100)      | (100)      | (100)      | (100)      | (100)      | (100)      | (100)      | (99.62)    | (100)      | (100)      | (99.87)    | (100)      | (99.87)    | (100)      | (100)      | (100)      | (100)      | (100)      | (100)      | (100)      | (100)      | (100)      | (100)      |
| MT394214.1  | (100)       | (100)      | (100)      | (100)      | (100)      | (100)      | (100)      | (100)      | (99.62)    | (100)      | (100)      | (99.87)    | (100)      | (99.87)    | (100)      | (100)      | (100)      | (100)      | (100)      | (100)      | (100)      | (100)      | (100)      | (100)      |
| MT394215.1  | (100)       | (100)      | (100)      | (100)      | (100)      | (100)      | (100)      | (100)      | (99.62)    | (100)      | (100)      | (99.87)    | (100)      | (99.87)    | (100)      | (100)      | (100)      | (100)      | (100)      | (100)      | (100)      | (100)      | (100)      | (100)      |
| MT394216.1  | (100)       | (100)      | (100)      | (100)      | (100)      | (100)      | (100)      | (100)      | (99.62)    | (100)      | (100)      | (99.87)    | (100)      | (99.87)    | (100)      | (100)      | (100)      | (100)      | (100)      | (100)      | (100)      | (100)      | (100)      | (100)      |
| MT394217.1  | (100)       | (100)      | (100)      | (100)      | (100)      | (100)      | (100)      | (100)      | (99.62)    | (100)      | (100)      | (99.87)    | (100)      | (99.87)    | (100)      | (100)      | (100)      | (100)      | (100)      | (100)      | (100)      | (100)      | (100)      | (100)      |
| MT394218.1  | (100)       | (100)      | (100)      | (100)      | (100)      | (100)      | (100)      | (100)      | (99.62)    | (100)      | (100)      | (99.87)    | (100)      | (99.87)    | (100)      | (100)      | (100)      | (100)      | (100)      | (100)      | (100)      | (100)      | (100)      | (100)      |
| MT394219.1  | (100)       | (100)      | (100)      | (100)      | (100)      | (100)      | (100)      | (100)      | (99.62)    | (100)      | (100)      | (99.87)    | (100)      | (99.87)    | (100)      | (100)      | (100)      | (100)      | (100)      | (100)      | (100)      | (100)      | (100)      | (100)      |
| MT394220.1  | (100)       | (100)      | (100)      | (100)      | (100)      | (100)      | (100)      | (100)      | (99.62)    | (100)      | (100)      | (99.87)    | (100)      | (99.87)    | (100)      | (100)      | (100)      | (100)      | (100)      | (100)      | (100)      | (100)      | (100)      | (100)      |
| MT394221.1  | (100)       | (100)      | (100)      | (100)      | (100)      | (100)      | (100)      | (100)      | (99.62)    | (100)      | (100)      | (99.87)    | (100)      | (99.87)    | (100)      | (100)      | (100)      | (100)      | (100)      | (100)      | (100)      | (100)      | (100)      | (100)      |
| MT394222.1  | (100)       | (100)      | (100)      | (100)      | (100)      | (100)      | (100)      | (100)      | (99.62)    | (100)      | (100)      | (99.87)    | (100)      | (99.87)    | (100)      | (100)      | (100)      | (100)      | (100)      | (100)      | (100)      | (100)      | (100)      | (100)      |
| MT394223.1  | (100)       | (100)      | (100)      | (100)      | (100)      | (100)      | (100)      | (100)      | (99.62)    | (100)      | (100)      | (99.87)    | (100)      | (99.87)    | (100)      | (100)      | (100)      | (100)      | (100)      | (100)      | (100)      | (100)      | (100)      | (100)      |
| MT394224.1  | (100)       | (100)      | (100)      | (100)      | (100)      | (100)      | (100)      | (100)      | (99.62)    | (100)      | (100)      | (99.87)    | (100)      | (99.87)    | (100)      | (100)      | (100)      | (100)      | (100)      | (100)      | (100)      | (100)      | (100)      | (100)      |

**Figure S2. Full *affiACE2* alleles comparison.** Amino acid identity percentage considering SRA-covered regions (in bold) or the entire deposited sequences (in brackets).

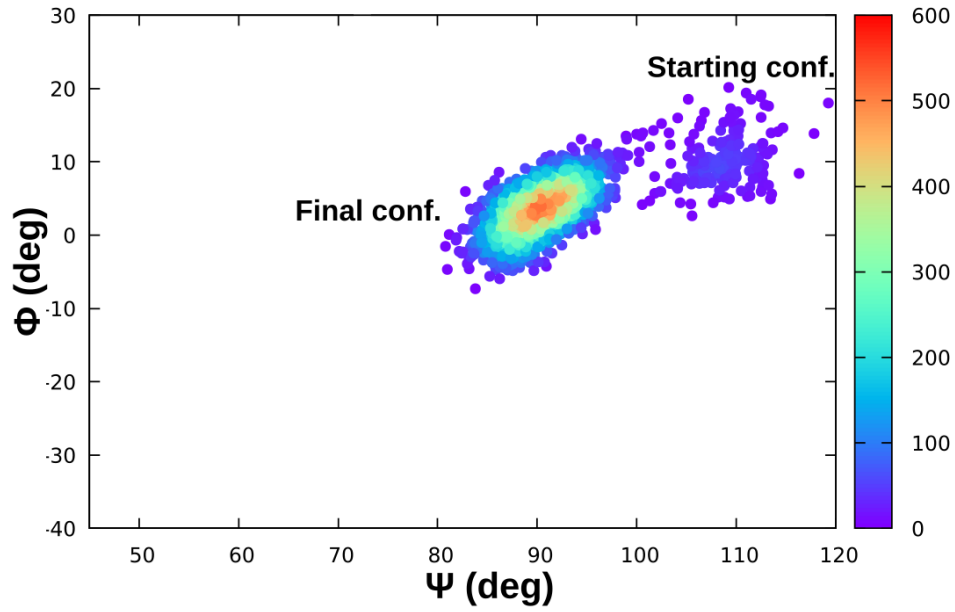

**Figure S3. RaTG13 RBD aperture in unbiased MD.** Density plot depicting the progressive closure of RaTG13 RBD over 200 ns.

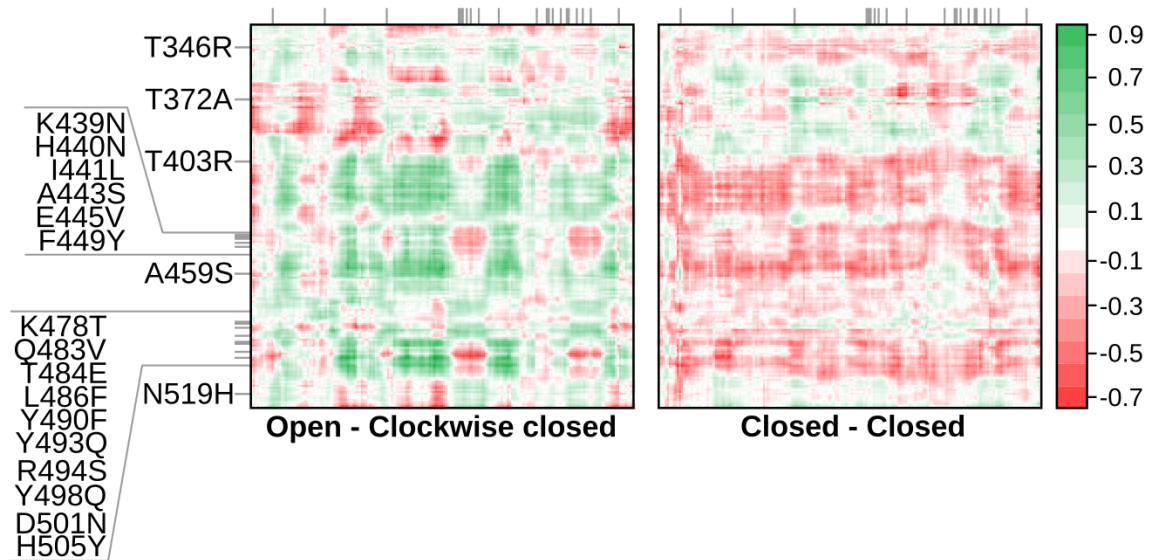

**Figure S4. RBD-RBD dynamic cross-correlation.** RBD-RBD differential cross-correlation of RaTG13 and S0 SARS-CoV-2 in the 1-up state. Positive values indicate increased cross-correlations in SARS-CoV-2 compared to RaTG13.

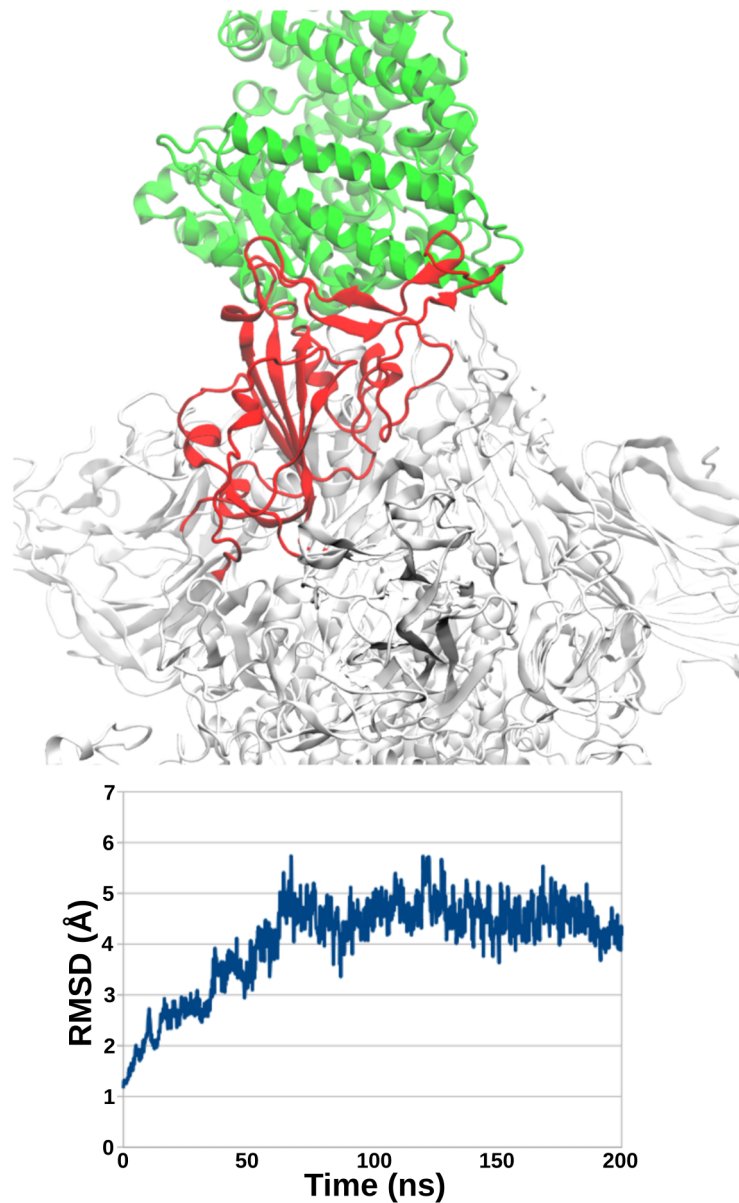

**Figure S5. Stability of RaTG13 spike complexed with hACE2.** In the upper panel is reported a representative structure of the complex after having reached the equilibrium. ACE2, RBD and spike remainder are depicted in green, red and white, respectively. In the lower panel is reported the RMSD (root mean square deviation) of the entire complex (heavy atoms only) along the 200 ns unbiased MD simulation.



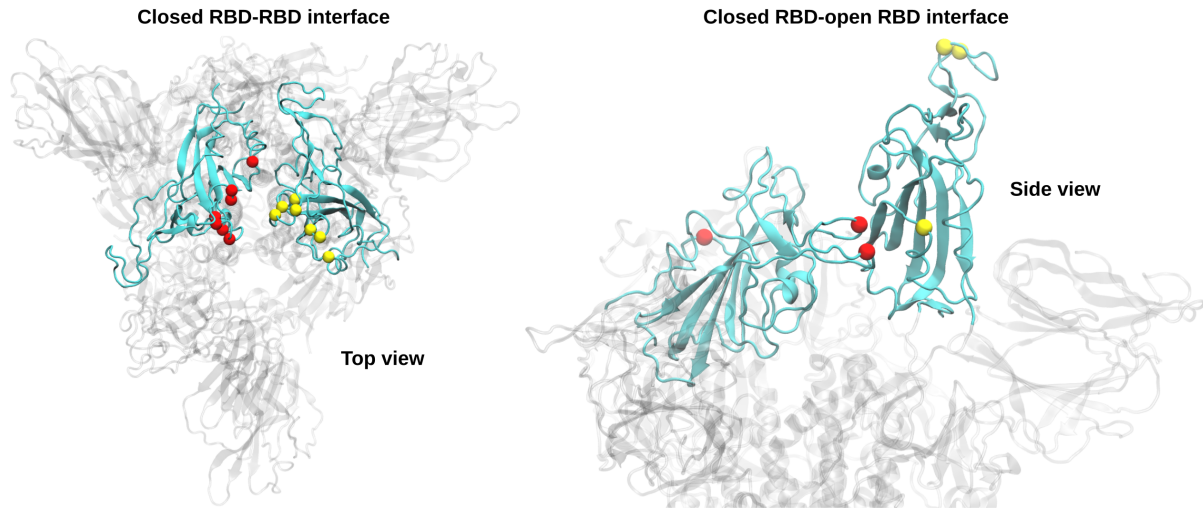

**Figure S6. Mutations at the RBD-RBD interface.** Mutations from RaTG13 to SARS-CoV-2 lying at the RBD-RBD interface between closed protomers or one closed and one open protomer. The proteins are depicted in ribbon, with interacting RBDs in solid cyan and protein remainder in transparent white. Mutations are depicted in yellow and red spheres depending on the protomer.

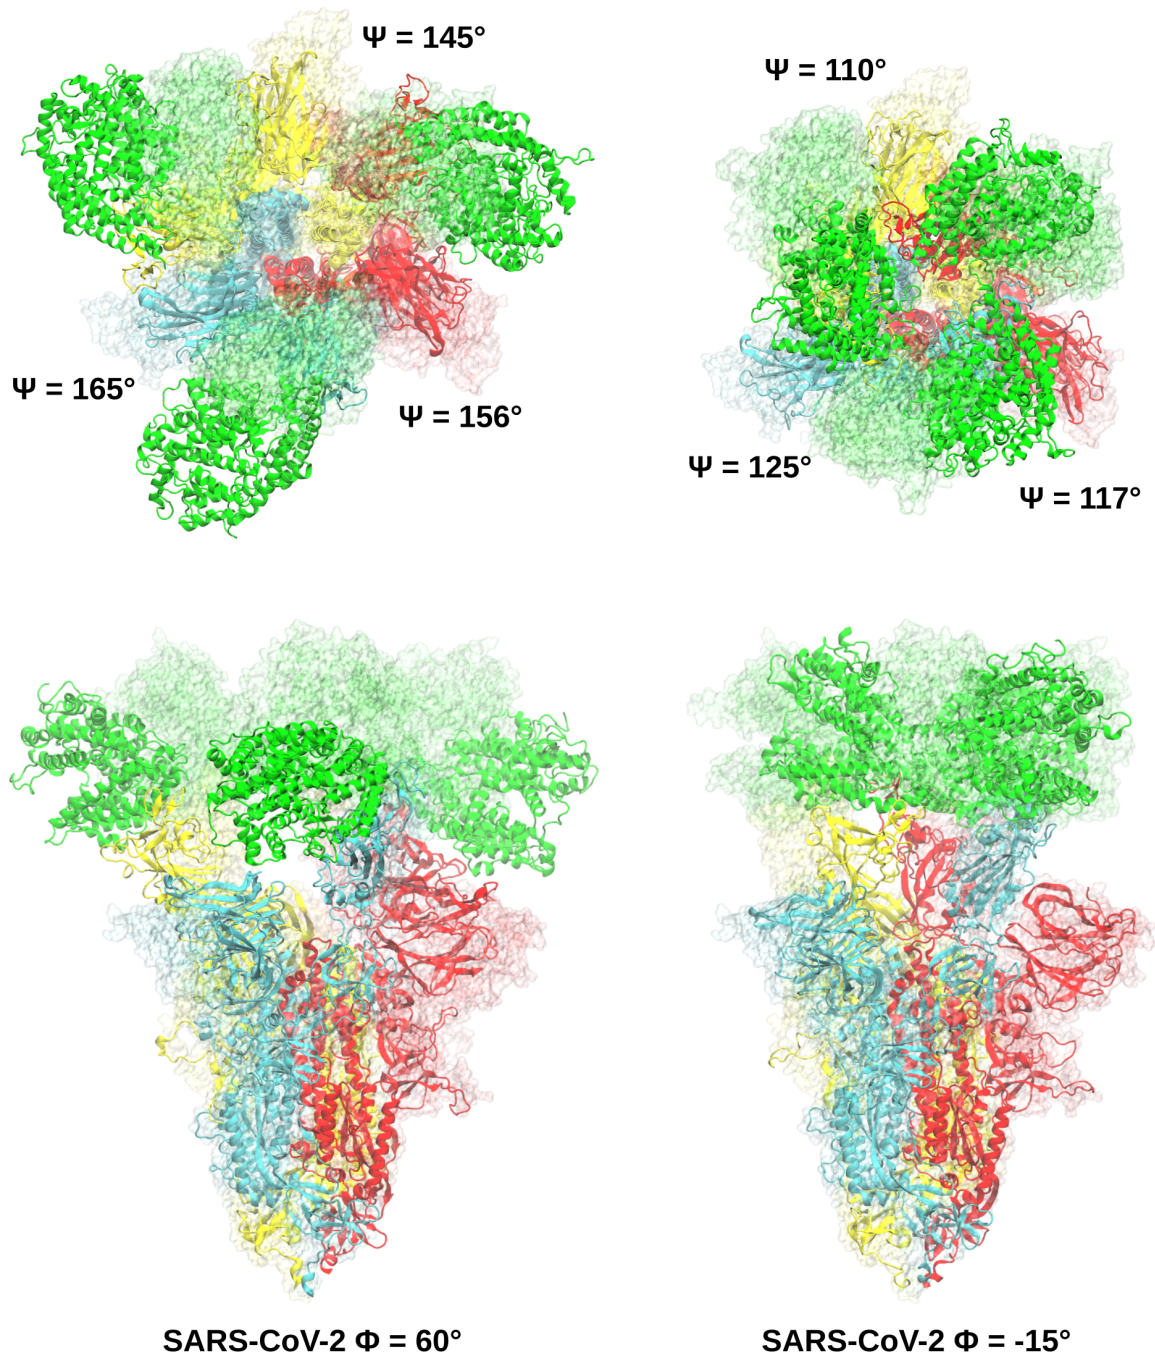

**Figure S7. SMD of the 3-up state.** Final frames of the SMD simulations at the target  $\Phi$  angle ( $60^\circ$  and  $-15^\circ$ ). The final  $\Psi$  angle necessary to accommodate RBDs rotation is reported for each protomer. The starting conformation is represented in transparent surface, the final conformations in ribbon. The spike protomers are colored in yellow, cyan and red, ACE2 molecules in green.

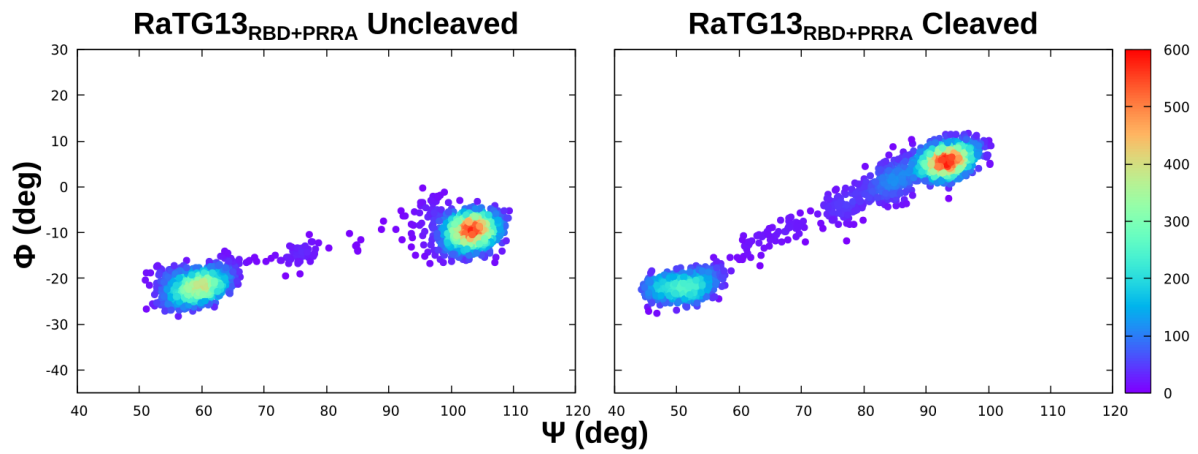

**Figure S8. RBD closed-to-1-up transition of RaTG13<sub>RBD+PRRA</sub> spikes.** TMD evolution plotted as a function of density considering the  $\Psi$  and  $\Phi$  angles.

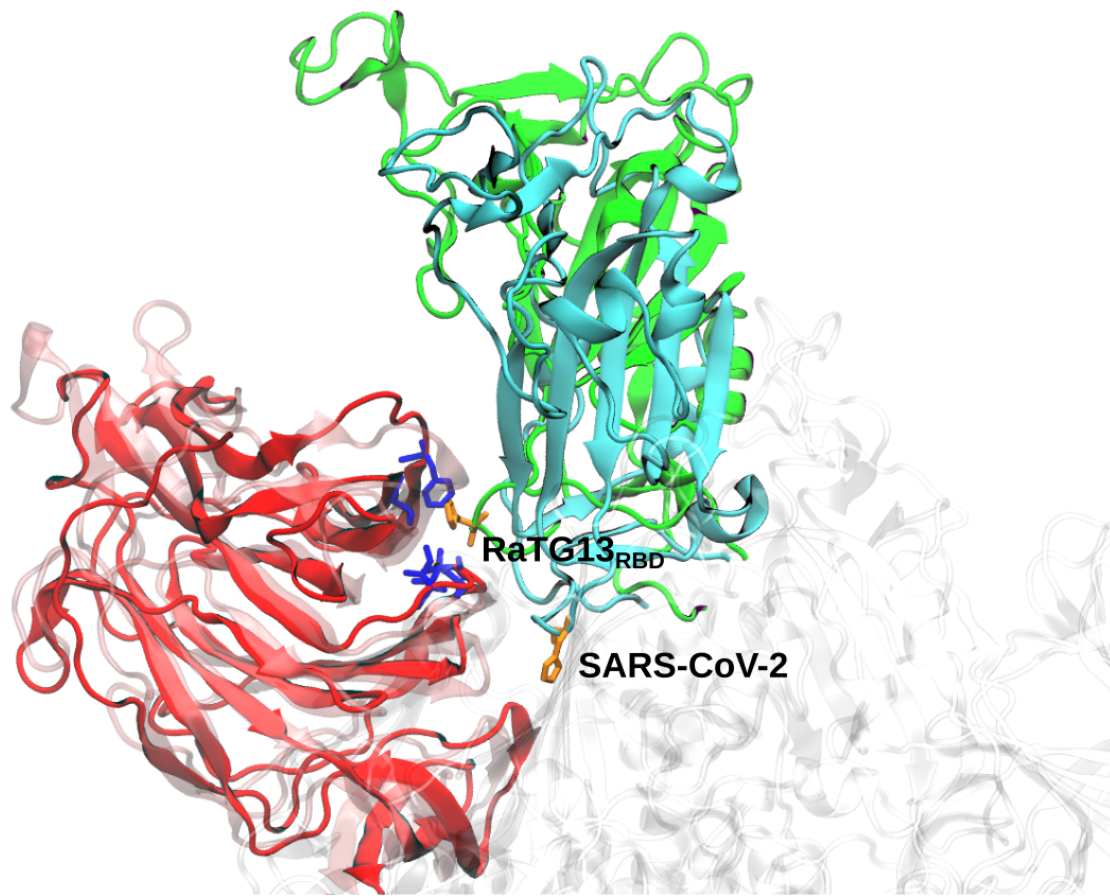

**Figure S9. H519 insertion.** Representative structure of H519 insertion into the NTD hydrophobic pocket. The NTD, SARS-CoV-2 RBD and RaTG13<sub>RBD</sub> are depicted in red, cyan and green ribbon, respectively. H519 and the residues forming the hydrophobic pocket are depicted in orange and blue licorice, respectively.

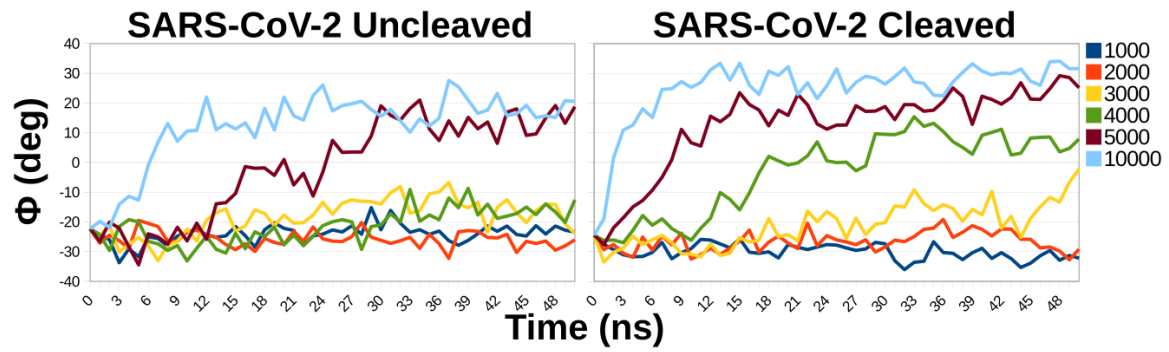

**Figure S10. SARS-CoV-2 switch phase TMDs.** Short (50 ns) closed-to-1-up TMDs of uncleaved and cleaved SARS-CoV-2 at fixed  $\kappa$  (kJoule/mol/nm). Initial frames were taken from the corresponding complete transition TMDs at the end of the lag phase. The switch was monitored as a function of  $\Phi$ .

| A | Calculated $K_d$ (nM)        |    |
|---|------------------------------|----|
|   |                              |    |
|   | RaTG13/ <i>affi</i> ACE2     | 39 |
|   | RaTG13/hACE2                 | 20 |
|   | SARS-CoV-2/ <i>affi</i> ACE2 | 23 |
|   | SARS-CoV-2/hACE2             | 48 |

  

| B     | RaTG13 > SARS-CoV-2 $\Delta\Delta G$ (kcal/mol) |       |
|-------|-------------------------------------------------|-------|
|       | <i>affi</i> ACE2                                | hACE2 |
| T346R | 0                                               | 0     |
| T372A | 0                                               | 0     |
| T403R | 0.1                                             | 0.1   |
| K439N | -0.1                                            | -0.2  |
| H440N | 0                                               | 0     |
| I441L | 0                                               | 0     |
| A443S | 0                                               | 0     |
| E445V | -0.2                                            | -0.2  |
| F449Y | -0.5                                            | 0.1   |
| A459S | 0                                               | 0     |
| K478T | -0.1                                            | -0.1  |
| Q483V | -0.1                                            | 0     |
| T484E | 0.1                                             | 0.1   |
| L486F | -0.1                                            | -0.2  |
| Y490F | 0                                               | 0     |
| Y493Q | 1                                               | 0.3   |
| R494S | 0                                               | 1.6   |
| Y498Q | 0.5                                             | 0.3   |
| D501N | -0.4                                            | 0.4   |
| H505Y | -0.6                                            | -1.1  |
| N519H | 0                                               | 0     |

**Table S1. MM-GBSA affinity calculation.** (A) Calculated  $K_d$  based on free energy calculations. (B) Differential per-residue energy contribution of the RBD mutations to the binding to *affi*ACE2 and hACE2.

|                                                                  | Crystal Form 1                                                                                 | Crystal Form 2                                                                                |
|------------------------------------------------------------------|------------------------------------------------------------------------------------------------|-----------------------------------------------------------------------------------------------|
| <b>Data Collection</b>                                           |                                                                                                |                                                                                               |
| X-ray source                                                     | ESRF ID23-EH1                                                                                  | ESRF ID23-EH1                                                                                 |
| Processing programs                                              | <i>XIA2-DIALS, AIMLESS</i>                                                                     | <i>XIA2-DIALS, AIMLESS</i>                                                                    |
| Space group                                                      | P2 <sub>1</sub>                                                                                | P2 <sub>1</sub> 2 <sub>1</sub> 2 <sub>1</sub>                                                 |
| Cell parameters                                                  | a = 83.6 Å; $\beta$ = 115.7°<br>b = 131.2 Å; $\gamma$ = 90.0°<br>c = 115.7 Å; $\alpha$ = 99.8° | a = 89.9 Å; $\beta$ = 90.0°<br>b = 107.7 Å; $\gamma$ = 90.0°<br>c = 251.8 Å; $\alpha$ = 90.0° |
| Wavelength (Å)                                                   | 0.973                                                                                          | 0.973                                                                                         |
| Resolution (Å)                                                   | 69.75 – 4.49 (5.02 – 4.49)                                                                     | 66.42 – 6.50 (7.26 – 6.50)                                                                    |
| Total reflections                                                | 77828 (22169)                                                                                  | 44159 (12604)                                                                                 |
| Unique reflections                                               | 14753 (4138)                                                                                   | 5180 (1424)                                                                                   |
| <i>CC1/2</i> <sup>b</sup>                                        | 0.969 (0.378)                                                                                  | 0.979 (0.531)                                                                                 |
| Redundancy                                                       | 5.3 (5.4)                                                                                      | 8.5 (8.9)                                                                                     |
| Mean <i>I</i> / ( <i>I</i> )                                     | 3.9 (1.2)                                                                                      | 2.8 (0.4)                                                                                     |
| Completeness (%)                                                 | 99.4 (98.5)                                                                                    | 99.7 (99.2)                                                                                   |
| <i>R</i> <sub>sym</sub> <sup>c</sup>                             | 0.278 (1.178)                                                                                  | 0.459 (2.905)                                                                                 |
| <i>R</i> <sub>pim</sub> <sup>d</sup>                             | 0.198 (0.850)                                                                                  | 0.222 (1.407)                                                                                 |
| <b>Refinement</b>                                                |                                                                                                |                                                                                               |
| <i>R</i> <sub>work</sub> / <i>R</i> <sub>free</sub> <sup>e</sup> | 0.2777/0.2944                                                                                  | 0.3179/0.3450                                                                                 |
| Structural refinement protocol                                   | Restrained, Individual B factors + TLS                                                         | Rigid Body only                                                                               |
| Average B-factor (Å <sup>2</sup> )                               | 191.08                                                                                         | N/A                                                                                           |
| Total number of atoms                                            | 13101                                                                                          | 13101                                                                                         |
| Number of protein atoms                                          | 12791                                                                                          | 12791                                                                                         |
| RMS bond lengths (Å)                                             | 0.004                                                                                          | 0.005                                                                                         |
| RMS bond angles (°)                                              | 0.82                                                                                           | 0.81                                                                                          |
| Ramachandran Favored (%)                                         | 96.1                                                                                           | 93.1                                                                                          |
| Ramachandran Allowed (%)                                         | 3.9                                                                                            | 6.6                                                                                           |
| Ramachandran Outliers (%)                                        | 0.0                                                                                            | 0.3                                                                                           |

<sup>a</sup> Values in parentheses are for reflections in the highest resolution shell.

<sup>b</sup> Resolution limits were determined by applying a cut-off based on the mean intensity correlation coefficient of half-datasets (*CC1/2*) approximately of 0.5 (PA & K, 2012) .

<sup>c</sup>  $R_{sym} = [ \sum_{hkl} \sum_j | I_{hkl,j} - \langle I_{hkl} \rangle | ] / [ \sum_{hkl} \sum_j I_{hkl,j} ]$ , where  $I_{hkl}$  is the observed intensity for a reflection and  $\langle I_{hkl} \rangle$  is the average intensity obtained from multiple observations of symmetry-related reflections.

<sup>d</sup>  $R_{pim} = [ \sum_{hkl} (1/(n-1))^{1/2} \sum_j | I_{hkl,j} - \langle I_{hkl} \rangle | ] / [ \sum_{hkl} \sum_j I_{hkl,j} ]$  where  $I_{hkl}$  is the observed intensity for a reflection and  $\langle I_{hkl} \rangle$  is the average intensity obtained from multiple observations of symmetry-related reflections.

<sup>e</sup> *R*<sub>free</sub> values are calculated based on 5% randomly selected reflections.

**Table S2: data collection and refinement statistics for the RaTG13 RBD/hACE2 complex datasets.**

PA, K., & K, D. (2012). Linking crystallographic model and data quality. *Science (New York, N.Y.)*, 336(6084), 1030–1033. <https://doi.org/10.1126/SCIENCE.1218231>
